# Supplementary material for: A Large Genetic Causal Analysis of the Gut Microbiota and Urological Cancers: A Bidirectional Mendelian Randomization Study
Source: MDPI journal article supplement (doi:10.3390/nu15184086), 2023-09-21
Supplement: s1 [file s1]

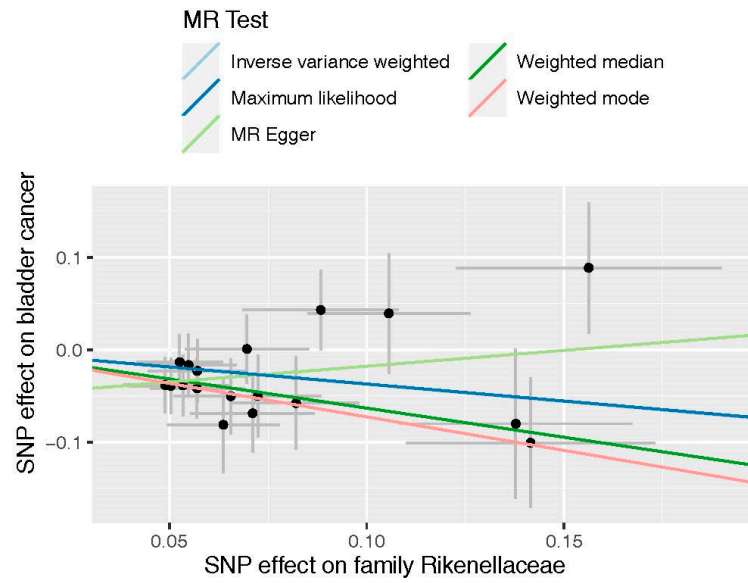

**Figure S1.** The scatter plot of family Rikenellaceae on bladder cancer

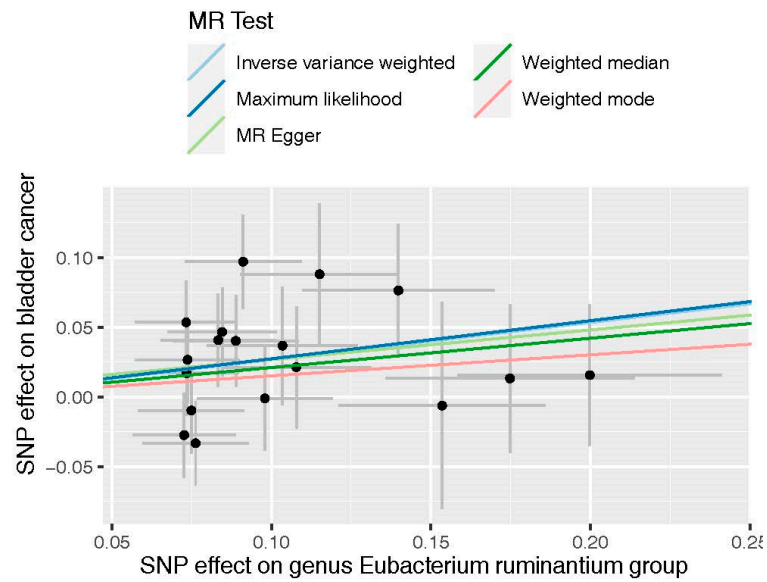

**Figure S2.** The scatter plot of genus Eubacterium ruminantium group on bladder cancer

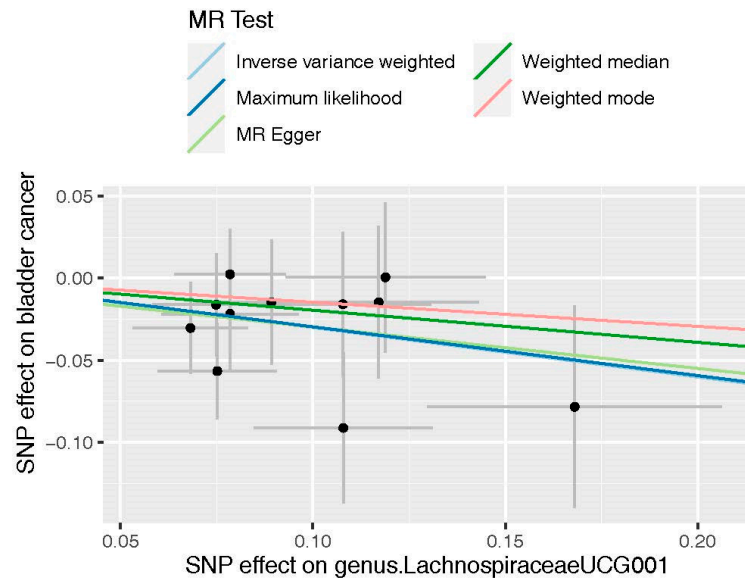

**Figure S3.** The scatter plot of genus Lachnospiraceae UCG001 on bladder cancer

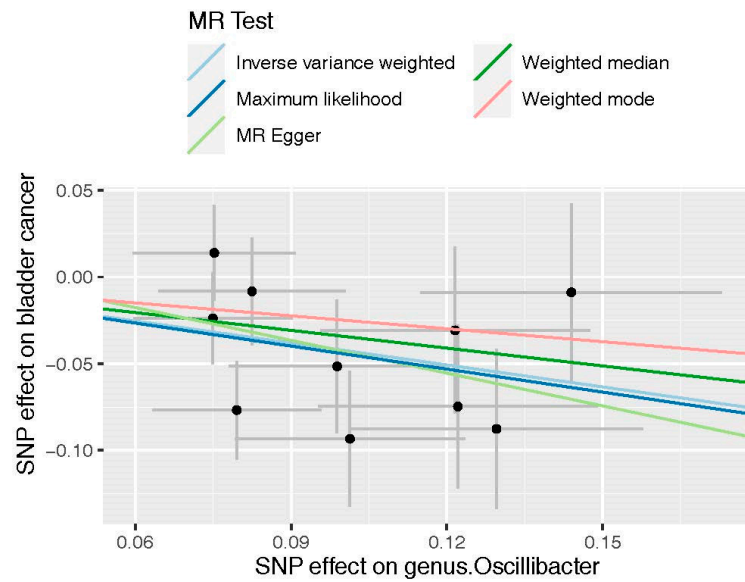

**Figure S4.** The scatter plot of genus Oscillibacte on bladder cancer

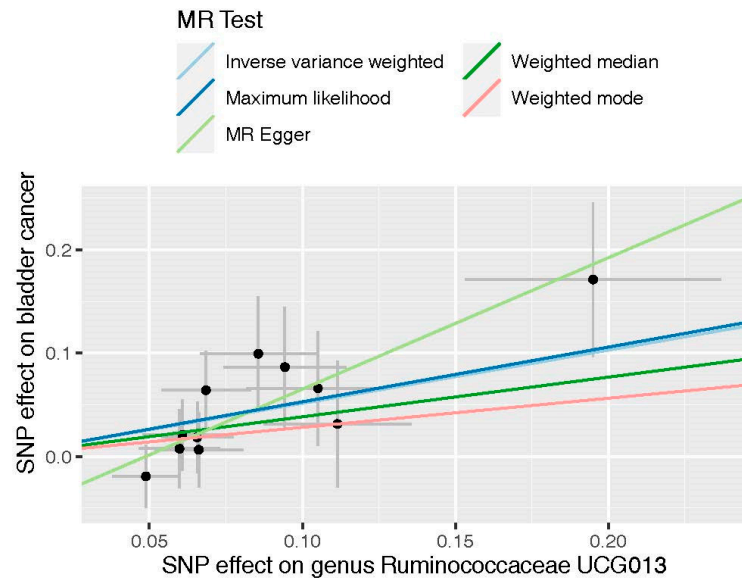

**Figure S5.** The scatter plot of genus Ruminococcaceae UCG013 on bladder cancer

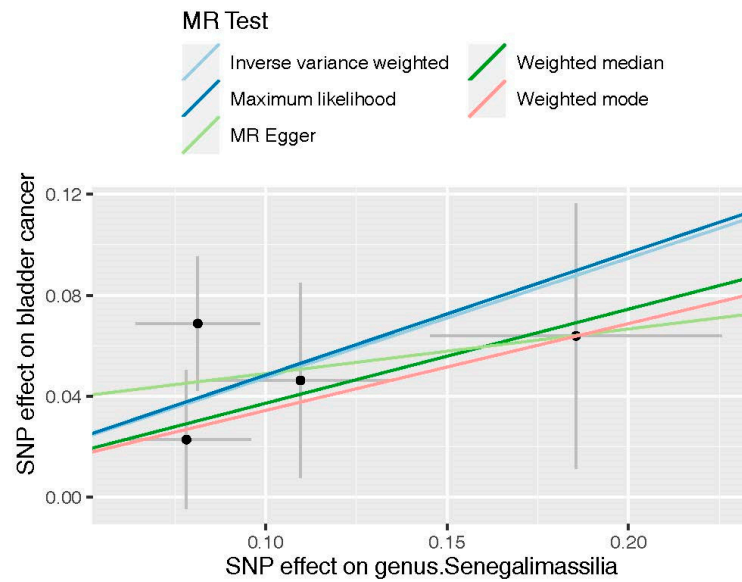

**Figure S6.** The scatter plot of genus Senegalimassilia on bladder cancer

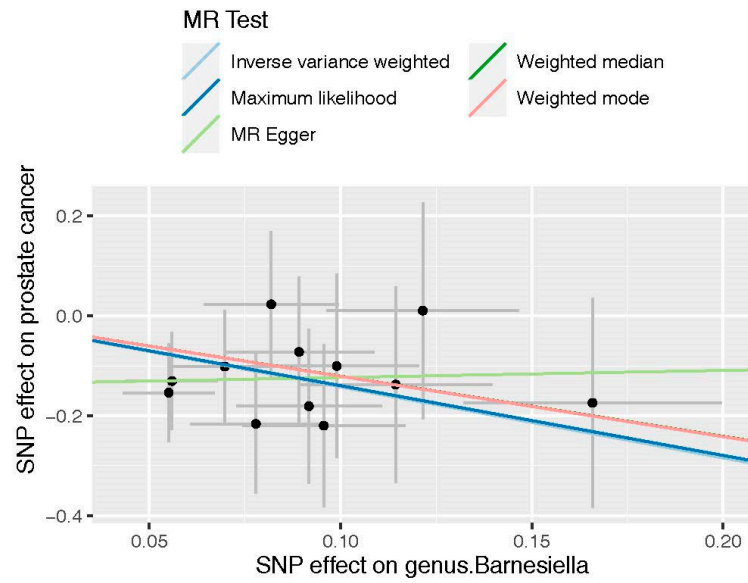

**Figure S7.** The scatter plot of genus Barnesiella on prostate cancer

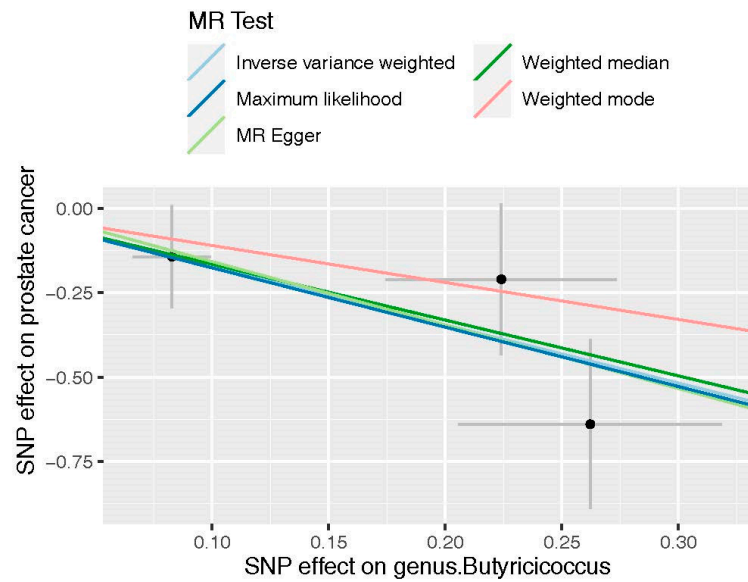

**Figure S8.** The scatter plot of genus Butyricoccus on prostate cancer



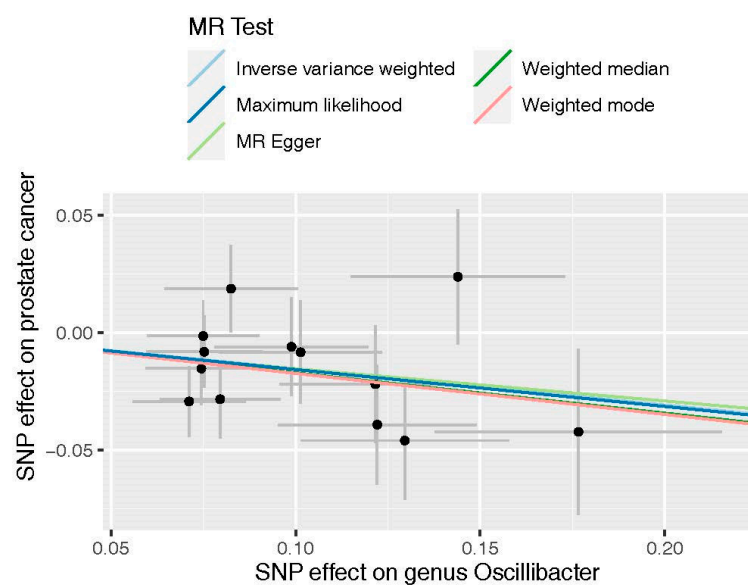

**Figure S9.** The scatter plot of genus Oscillibacter on prostate cancer

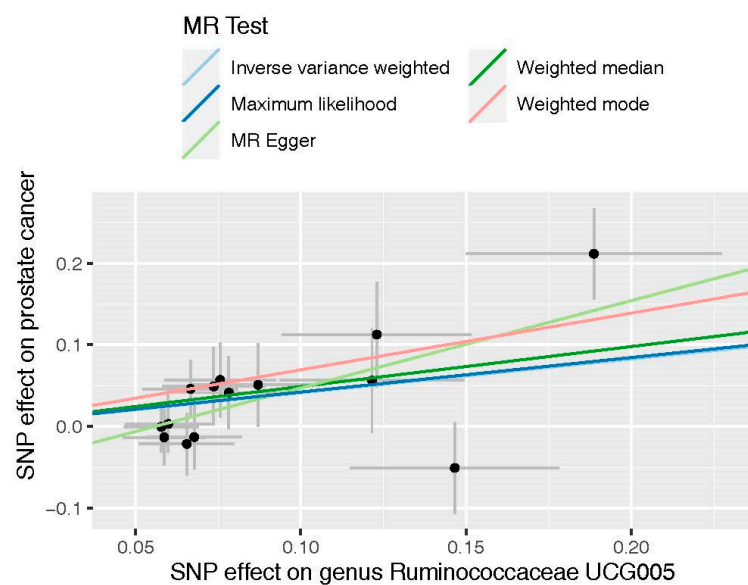

**Figure S10.** The scatter plot of genus Ruminococcaceae UCG005 on prostate cancer

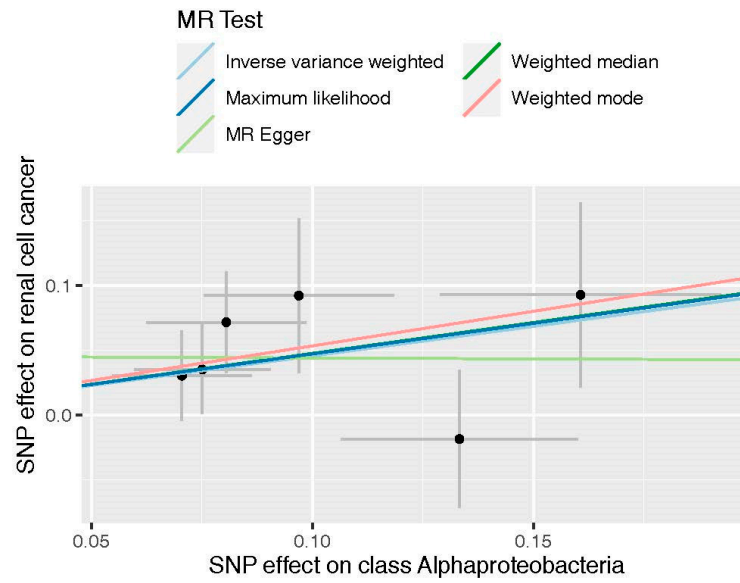

**Figure S11.** The scatter plot of class Alphaproteobacteria on renal cell cancer

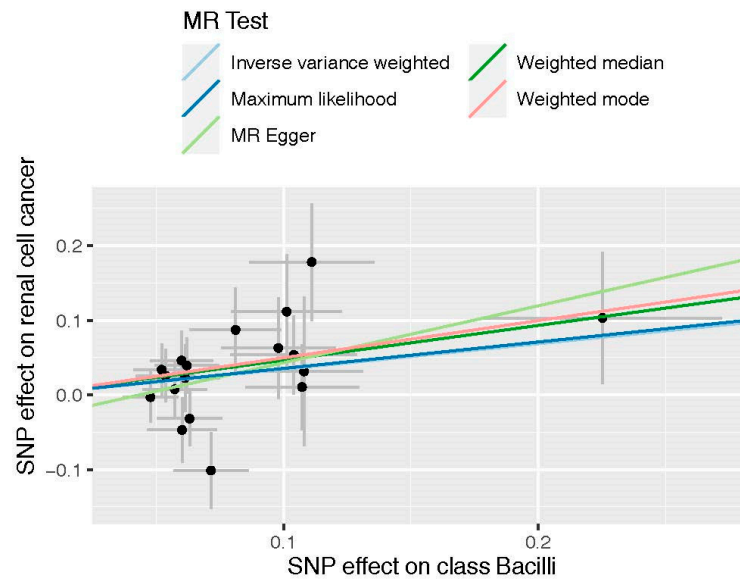

**Figure S12.** The scatter plot of class Bacilli on renal cell cancer

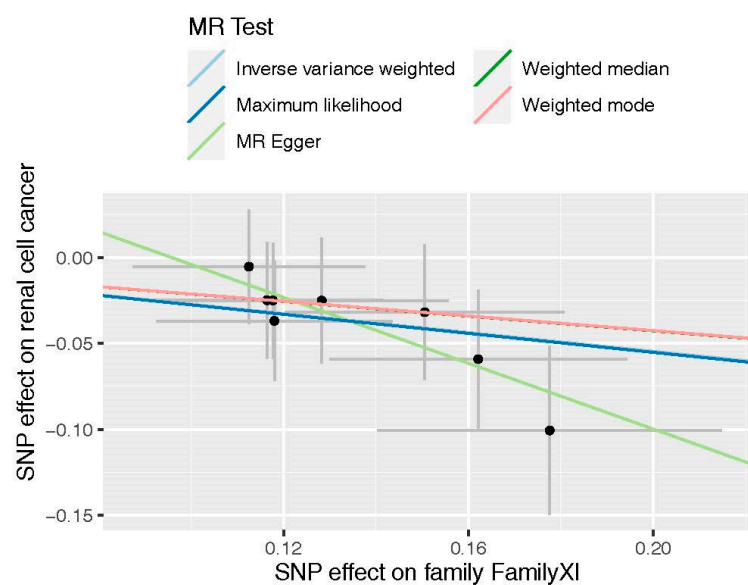

**Figure S13.** The scatter plot of family FamilyXI on renal cell cancer

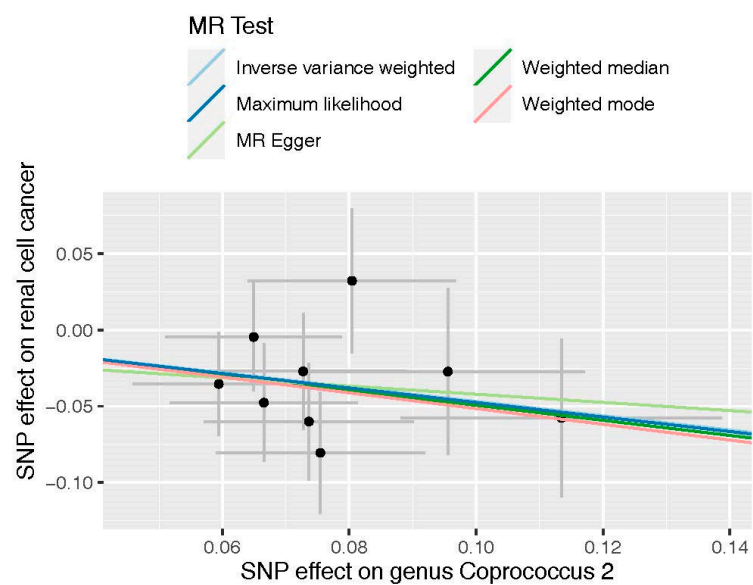

**Figure S14.** The scatter plot of genus Coprococcus 2 on renal cell cancer

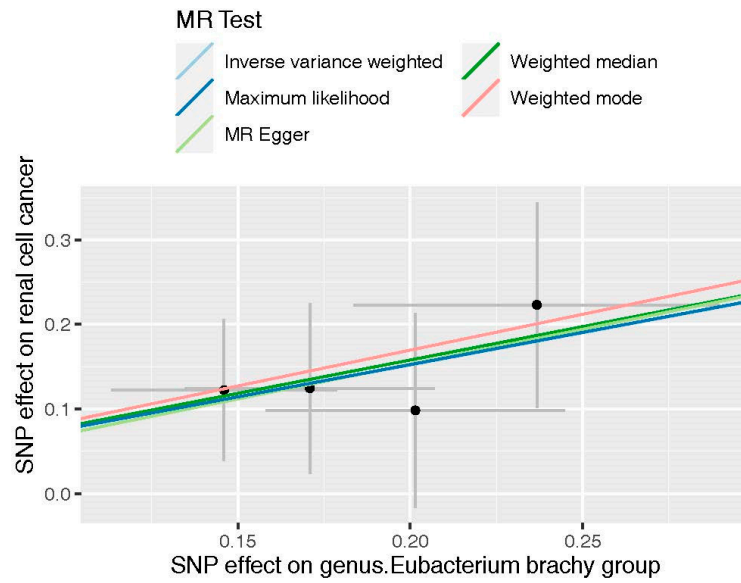

**Figure S15.** The scatter plot of genus Eubacterium brachy group on renal cell cancer

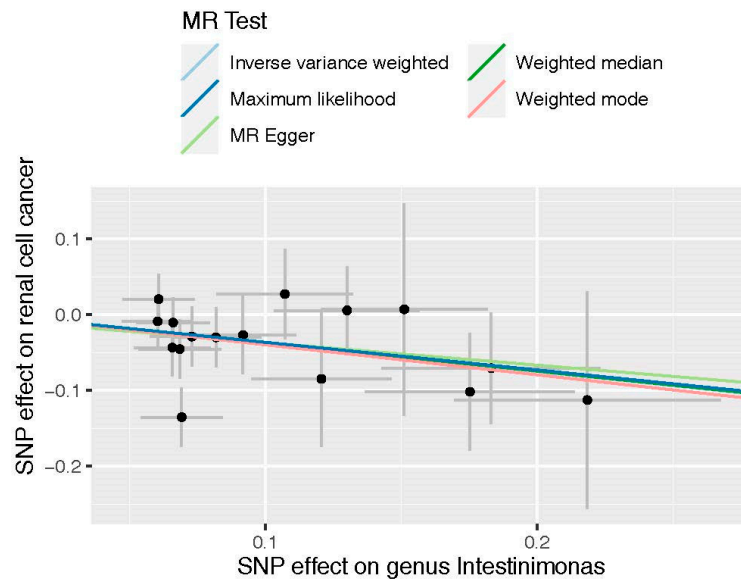

**Figure S16.** The scatter plot of genus Intestinimonas on renal cell cancer

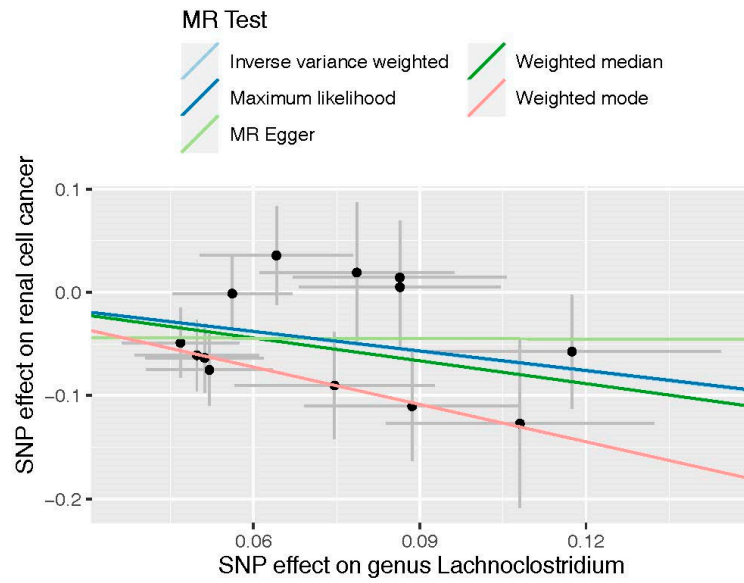

**Figure S17.** The scatter plot of genus Lachnospirillum on renal cell cancer

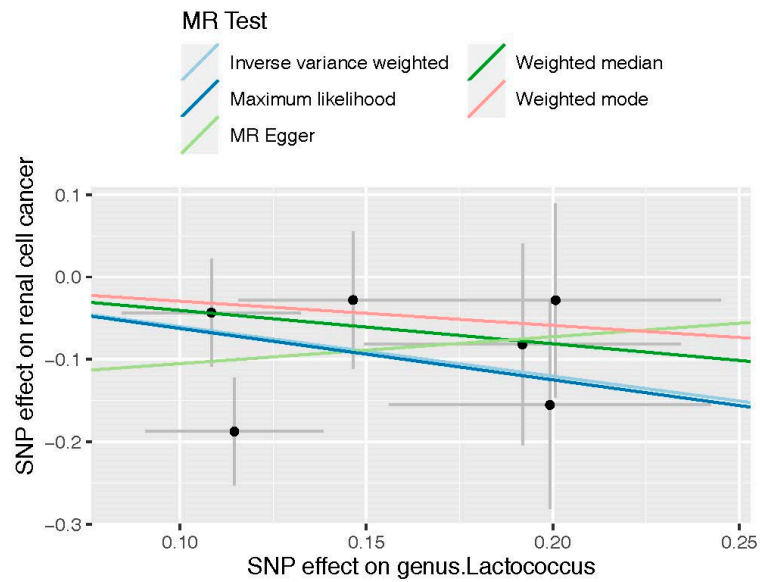

**Figure S18.** The scatter plot of genus Lactococcus on renal cell cancer

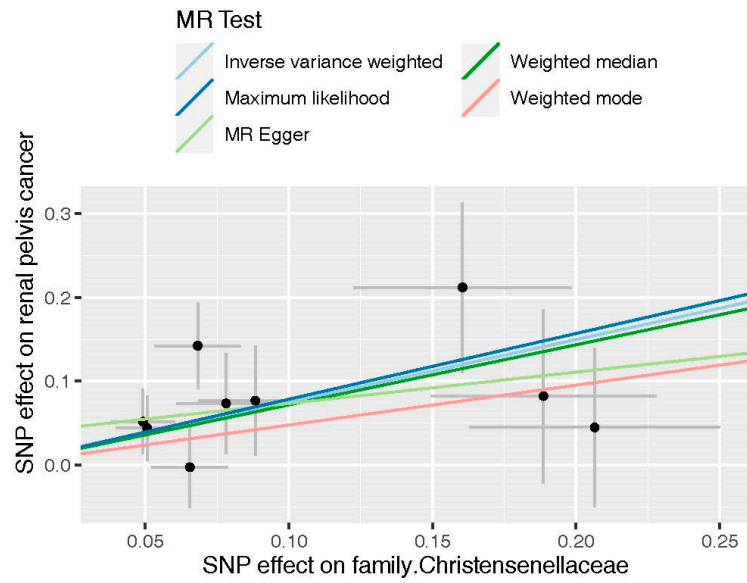

**Figure S19.** The scatter plot of family Christensenellaceae on renal pelvis cancer

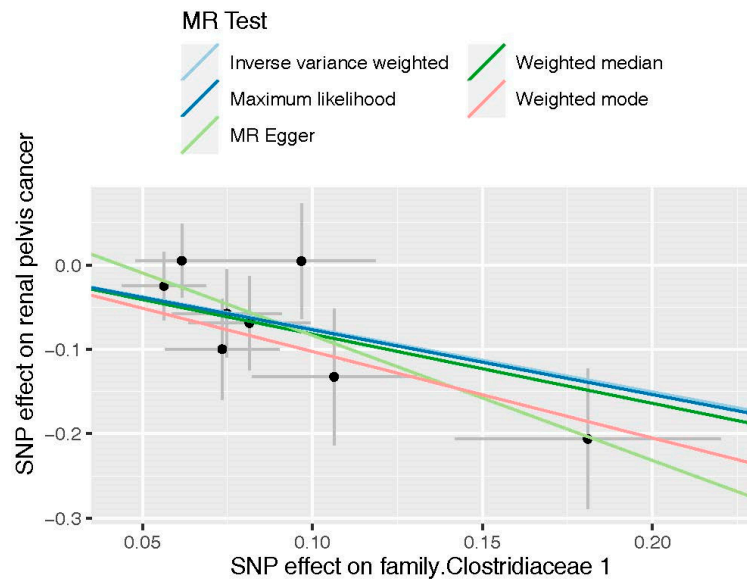

**Figure S20.** The scatter plot of family Clostridiaceae 1 on renal pelvis cancer

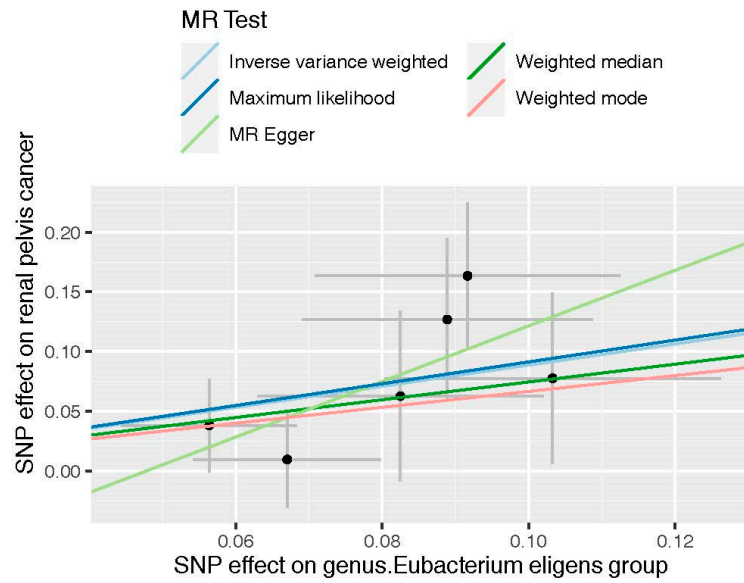

**Figure S21.** The scatter plot of genus Eubacterium eligens group on renal pelvis cancer

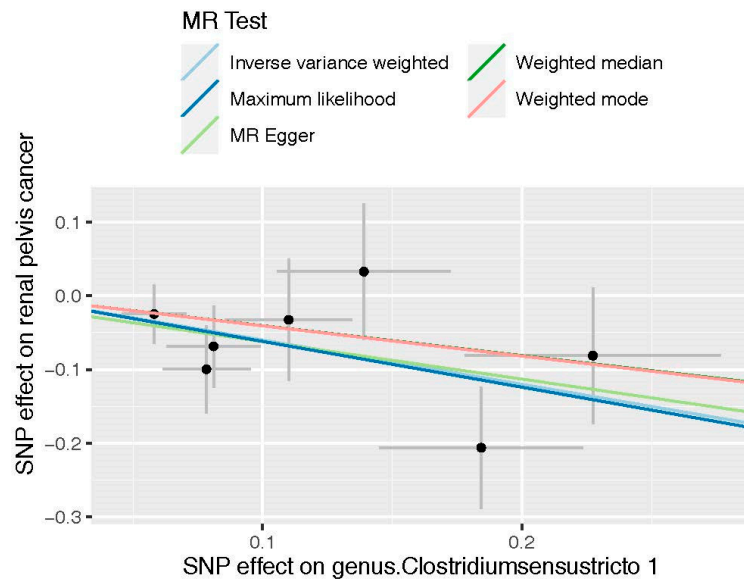

**Figure S22.** The scatter plot of genus Clostridium sensu stricto 1 on renal pelvis cancer

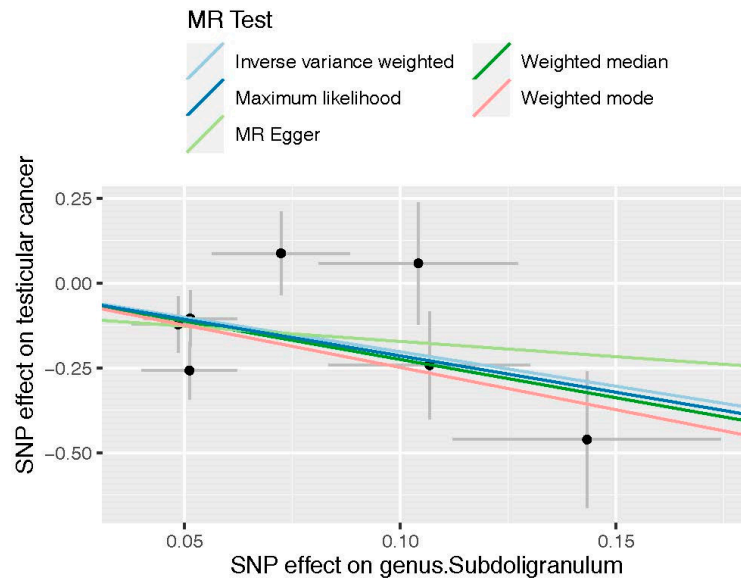

**Figure S23.** The scatter plot of genus Subdoligranulum on testicular cancer

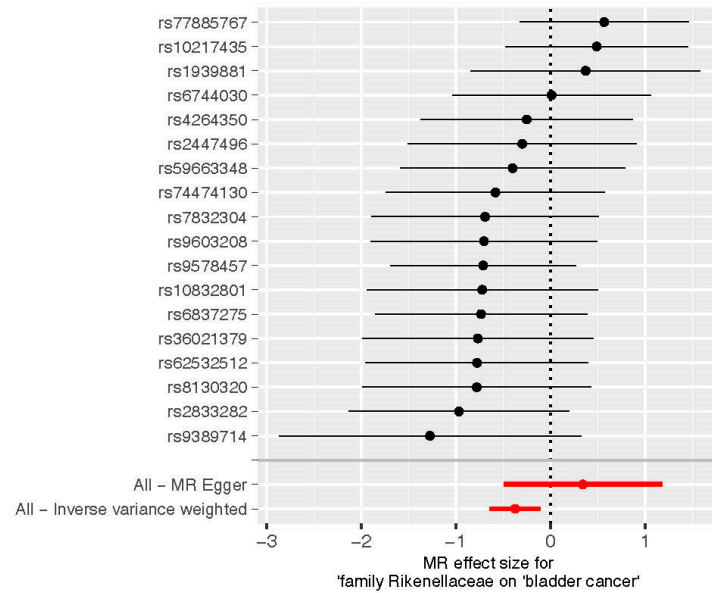

**Figure S24.** The forest plot of family Rikenellaceae on bladder cancer



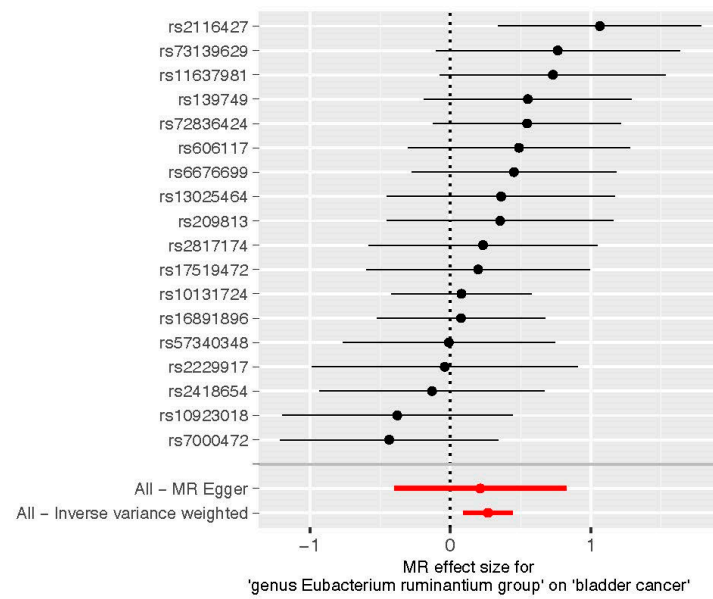

**Figure S25.** The forest plot of genus Eubacterium ruminantium group on bladder cancer

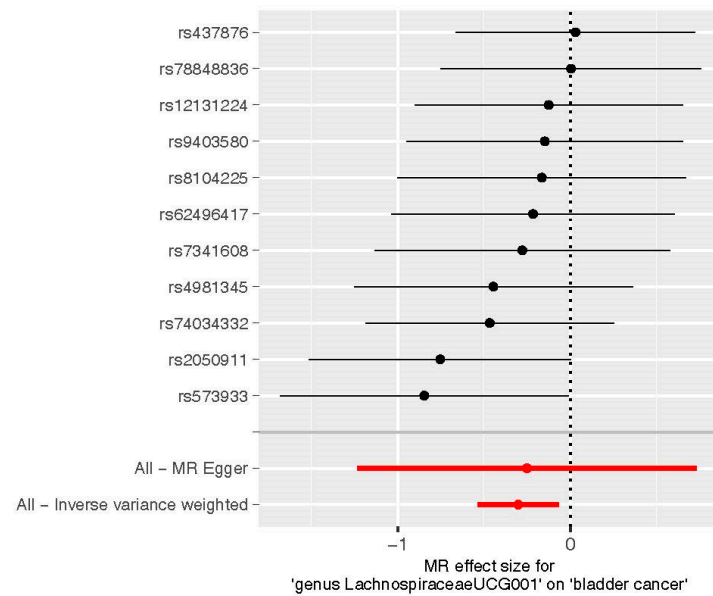

**Figure S26.** The forest plot of genus Lachnospiraceae UCG001 on bladder cancer

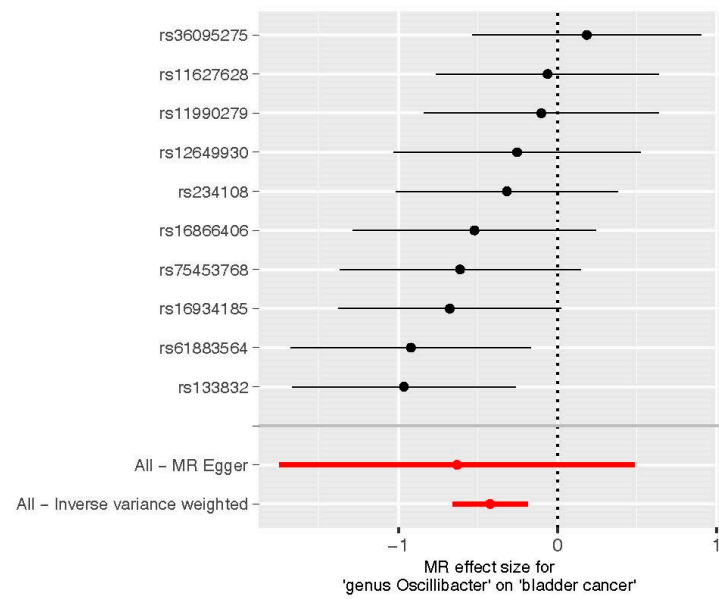

**Figure S27.** The forest plot of genus *Oscillibacter* on bladder cancer

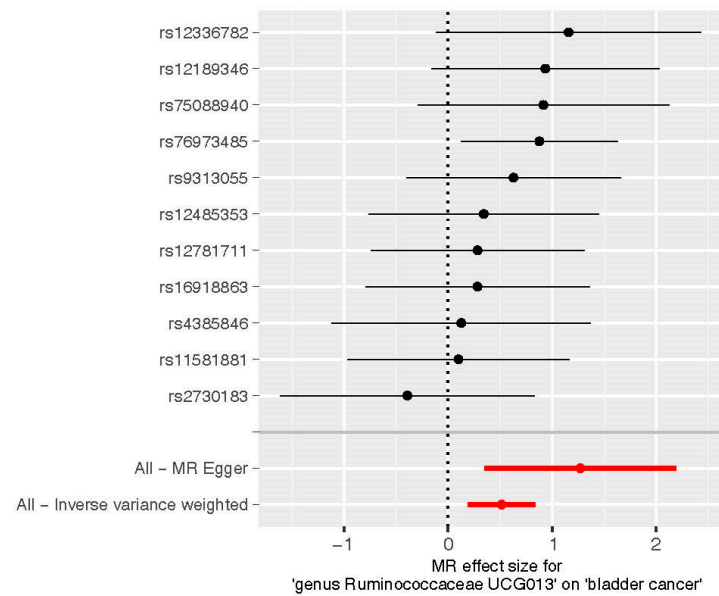

**Figure S28.** The forest plot of genus *Ruminococcaceae* UCG013 on bladder cancer

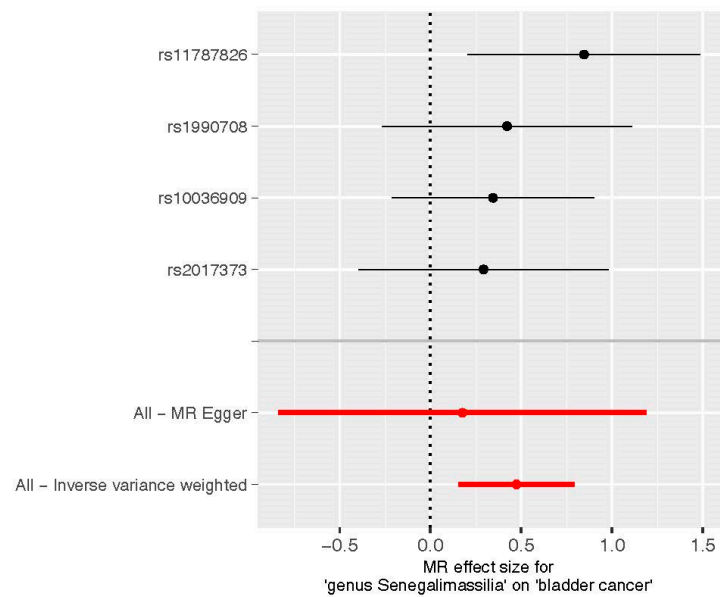

**Figure S29.** The forest plot of genus *Senegalimassilia* on bladder cancer

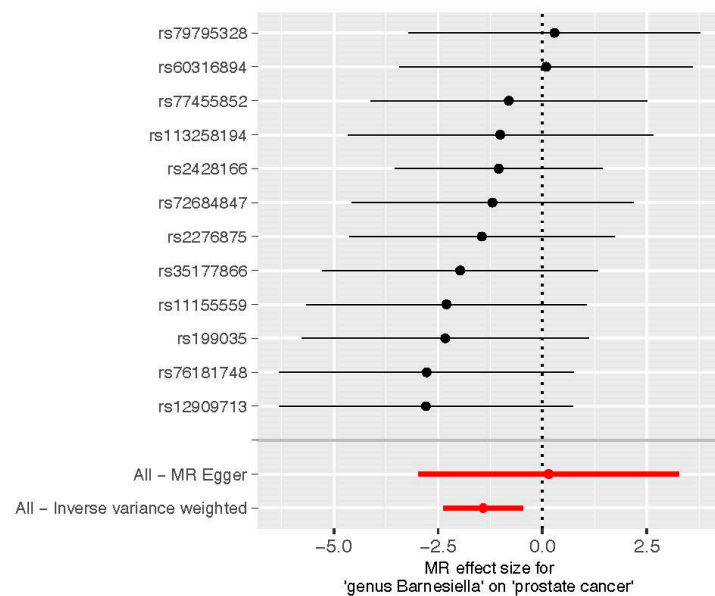

**Figure S30.** The forest plot of genus *Barnesiella* on prostate cancer

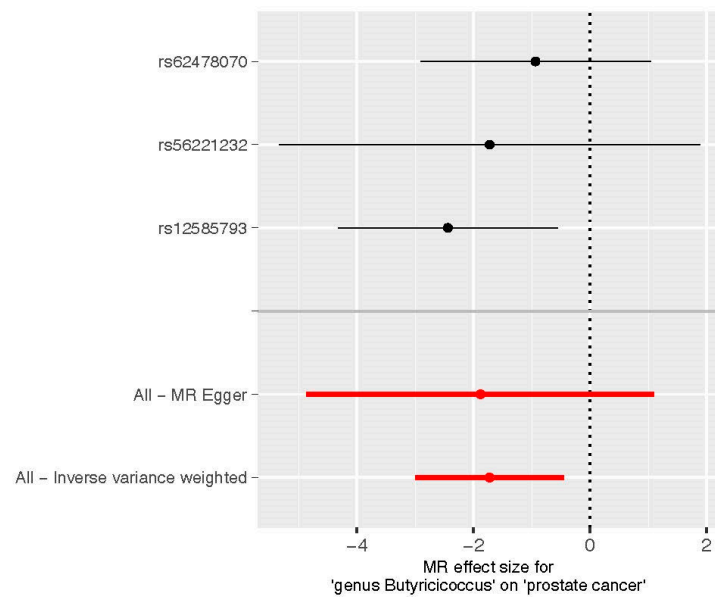

**Figure S31.** The forest plot of genus *Butyricicoccus* on prostate cancer

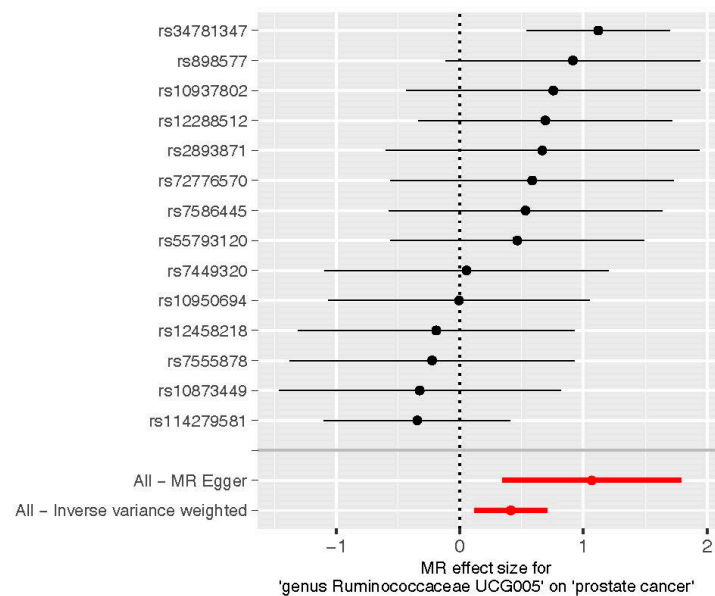

**Figure S32.** The forest plot of genus *Ruminococcaceae* UCG005 on prostate cancer

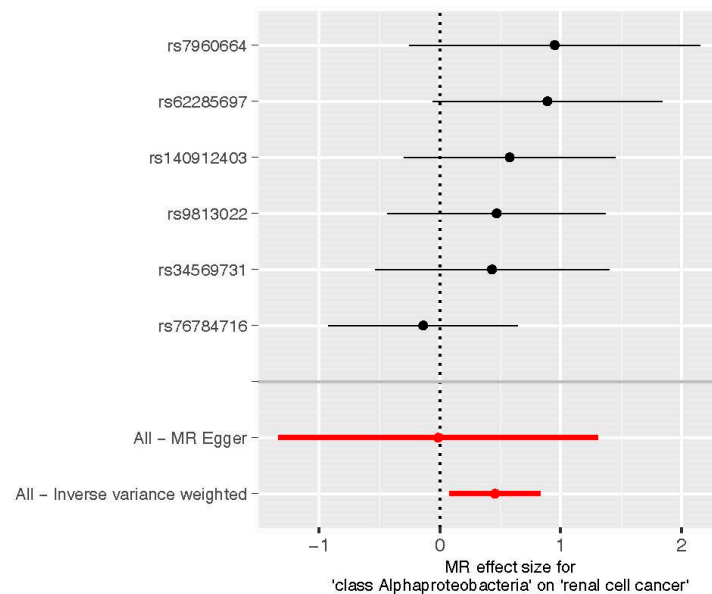

**Figure S33.** The forest plot of class Alphaproteobacteria on renal cell cancer

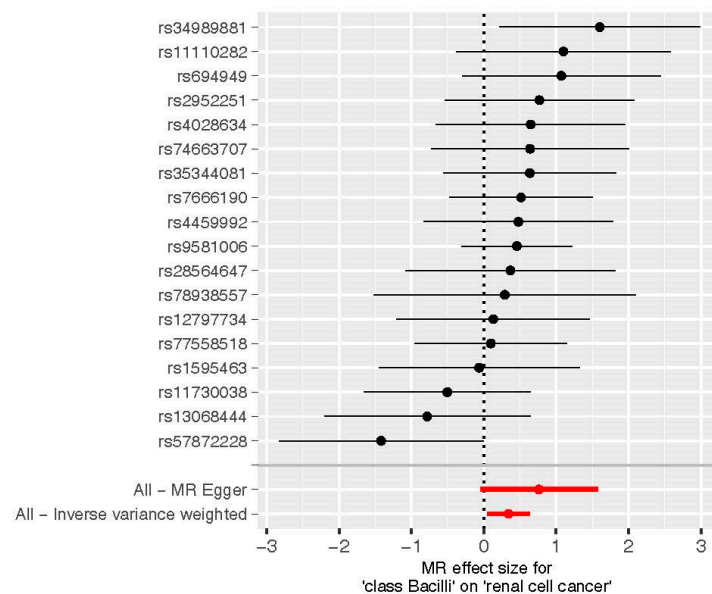

**Figure S34.** The forest plot of class Bacilli on renal cell cancer

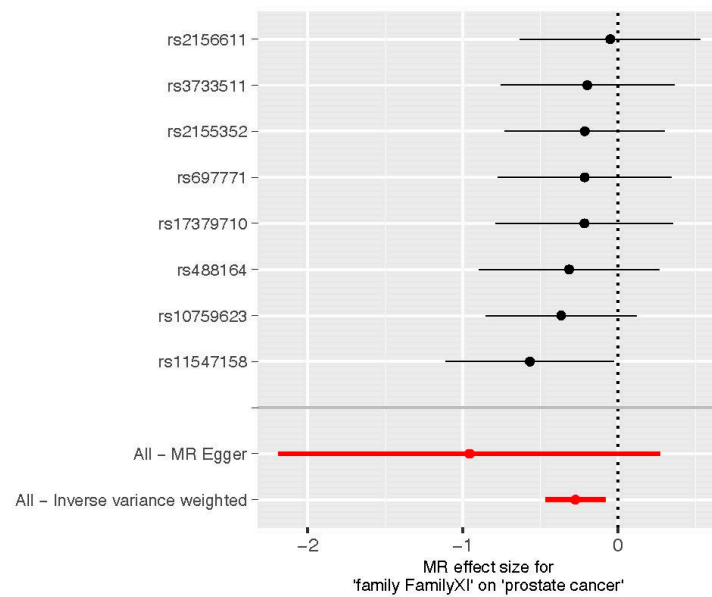

**Figure S35.** The forest plot of family FamilyXI on renal cell cancer

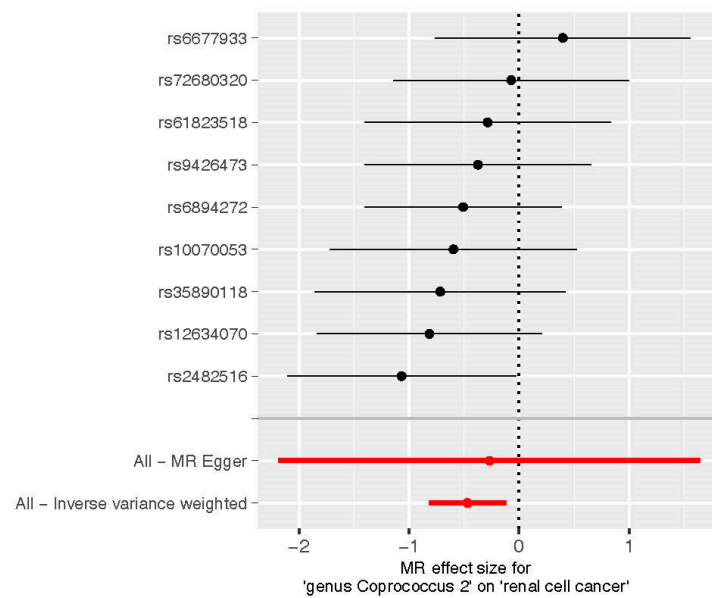

**Figure S36.** The forest plot of genus Coprococcus 2 on renal cell cancer

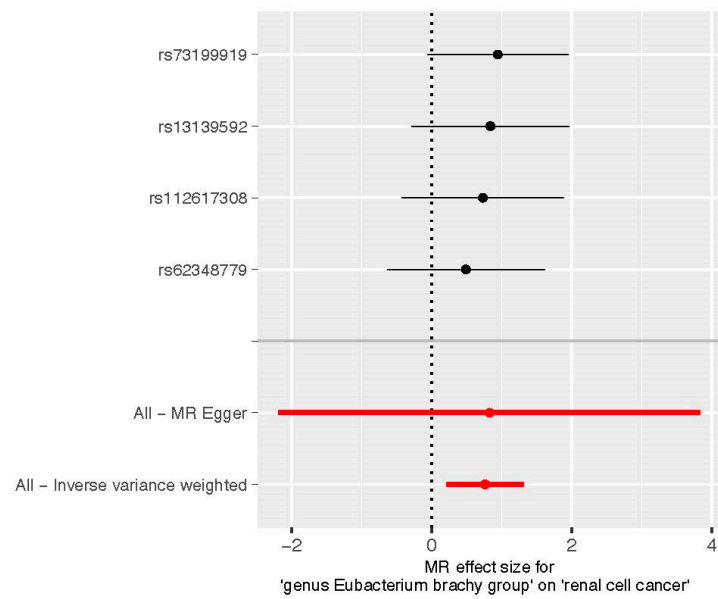

**Figure S37.** The forest plot of genus Eubacterium brachy group on renal cell cancer

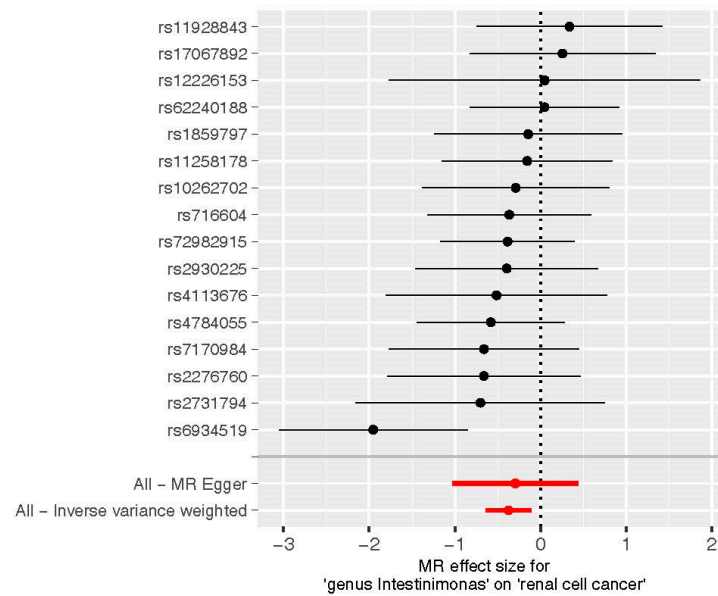

**Figure S38.** The forest plot of genus Intestinimonas on renal cell cancer

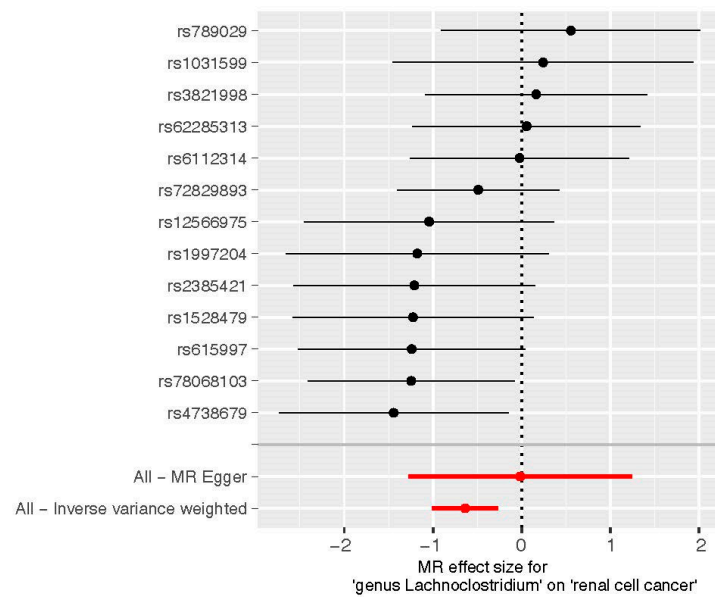

**Figure S39.** The forest plot of genus Lachnospirillum on renal cell cancer

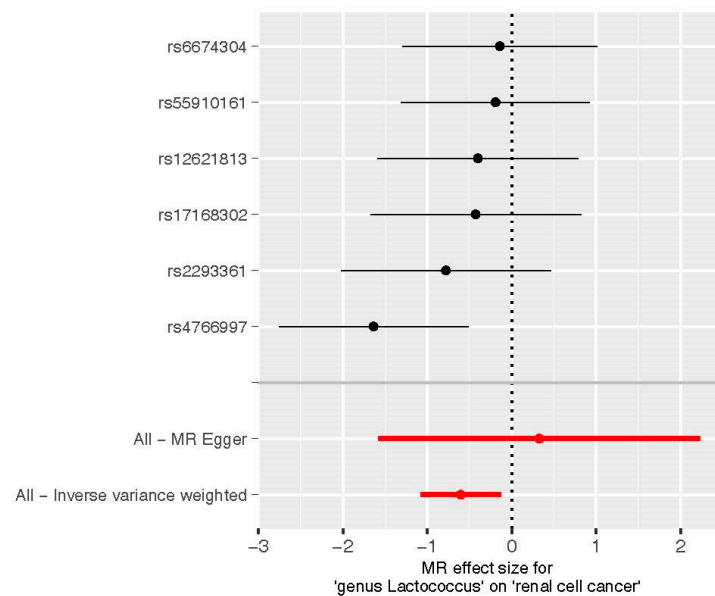

**Figure S40.** The forest plot of genus Lactococcus on renal cell cancer



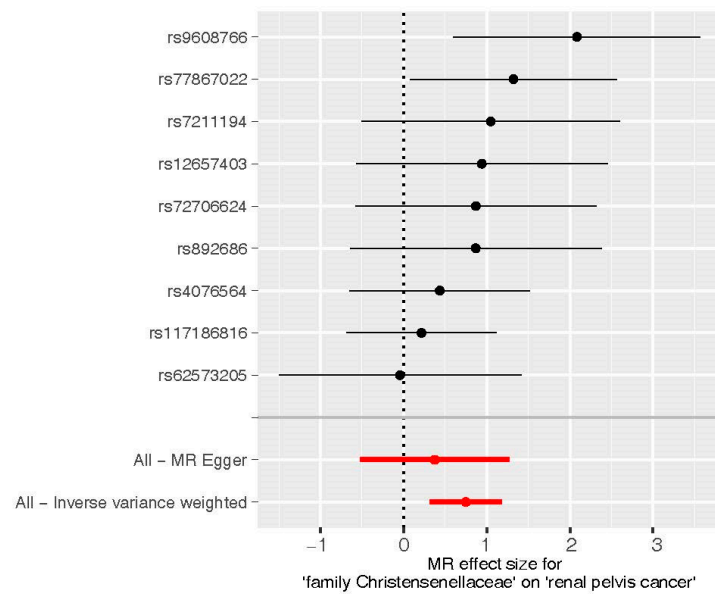

**Figure S41.** The forest plot of family Christensenellaceae on renal pelvis cancer

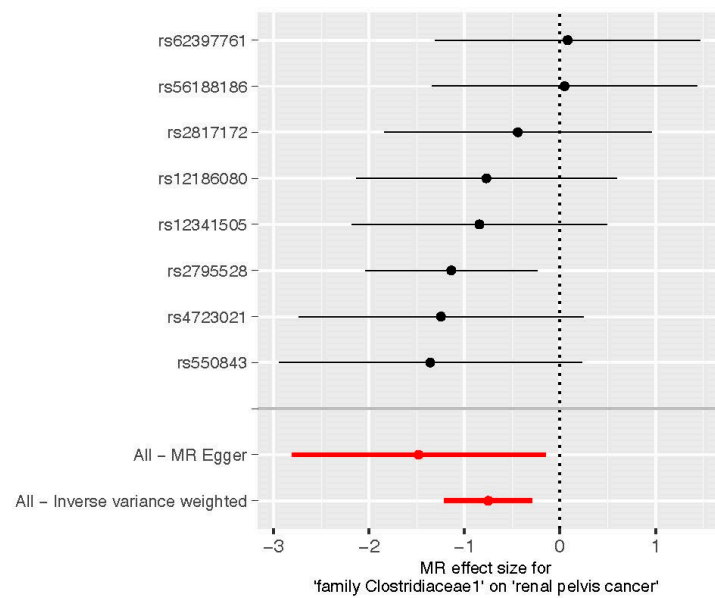

**Figure S42.** The forest plot of family Clostridiaceae 1 on renal pelvis cancer

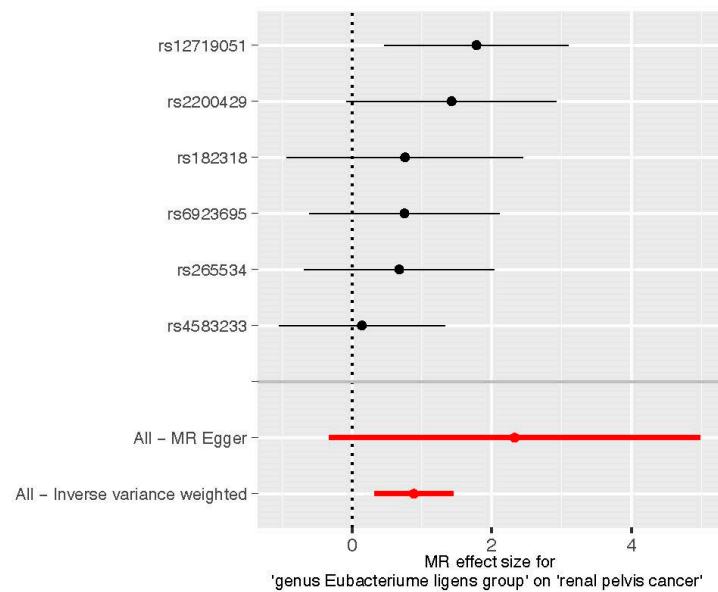

**Figure S43.** The forest plot of genus *Eubacterium eligens* group on renal pelvis cancer

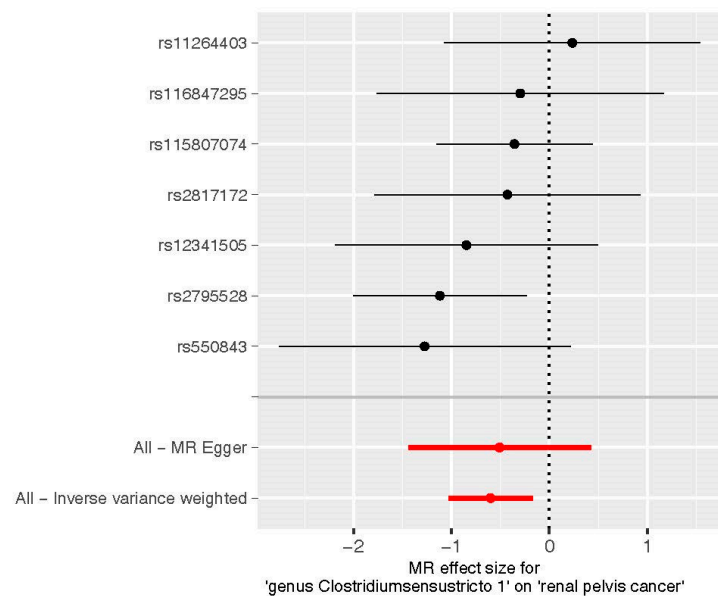

**Figure S44.** The forest plot of genus *Clostridium sensu stricto* 1 on renal pelvis cancer

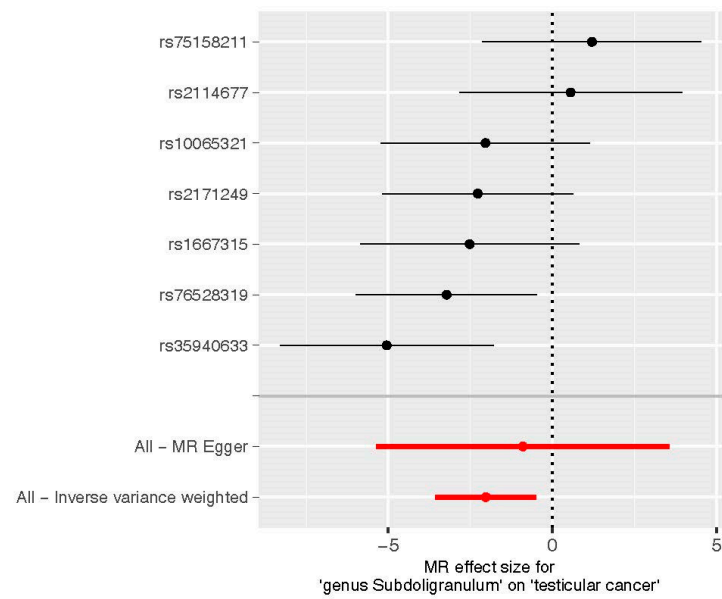

**Figure S45.** The forest plot of genus *Subdoligranulum* on testicular cancer

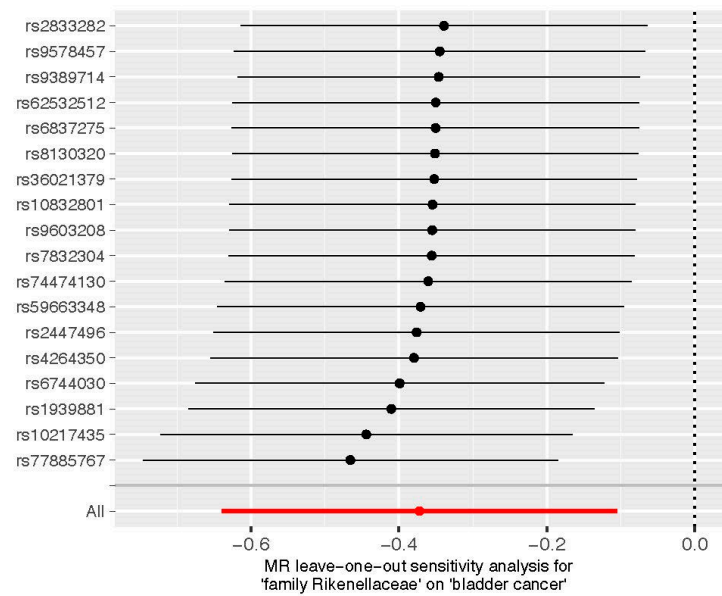

**Figure S46.** The leave-one-out test of family *Rikenellaceae* on bladder cancer

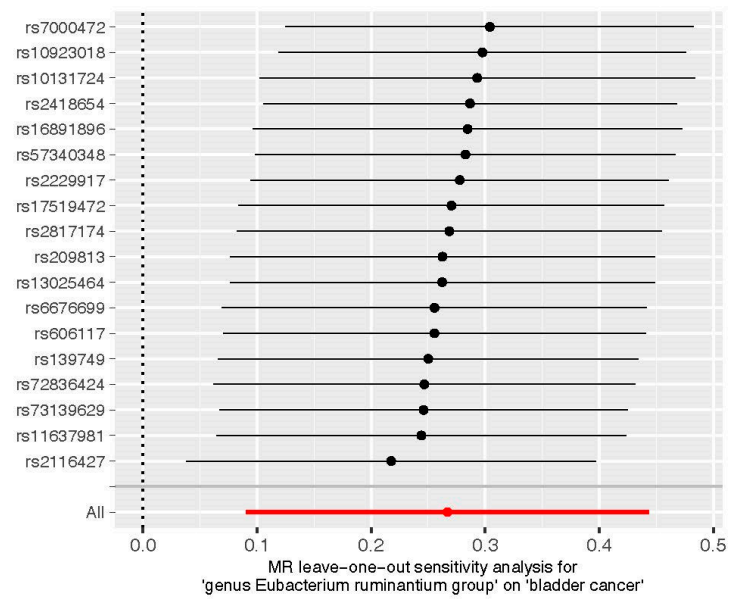

**Figure S47.** The leave-one-out test of genus *Eubacterium ruminantium* group on bladder cancer

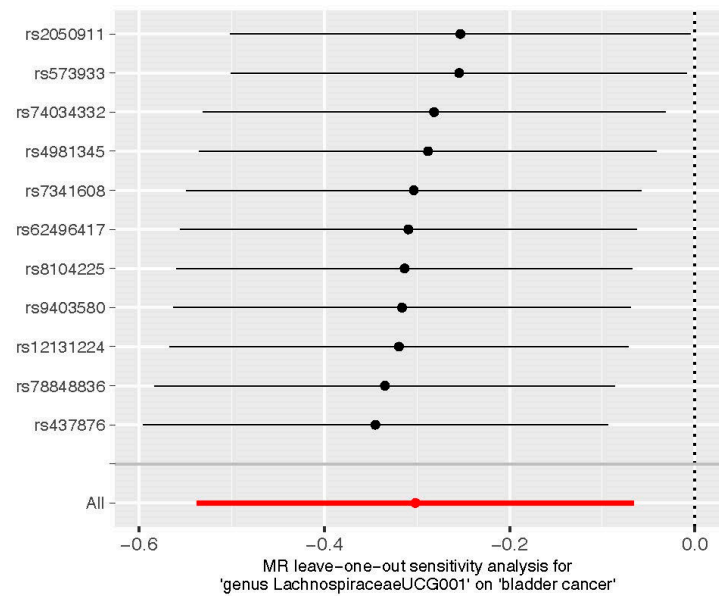

**Figure S48.** The leave-one-out test of genus *Lachnospiraceae* UCG001 on bladder cancer

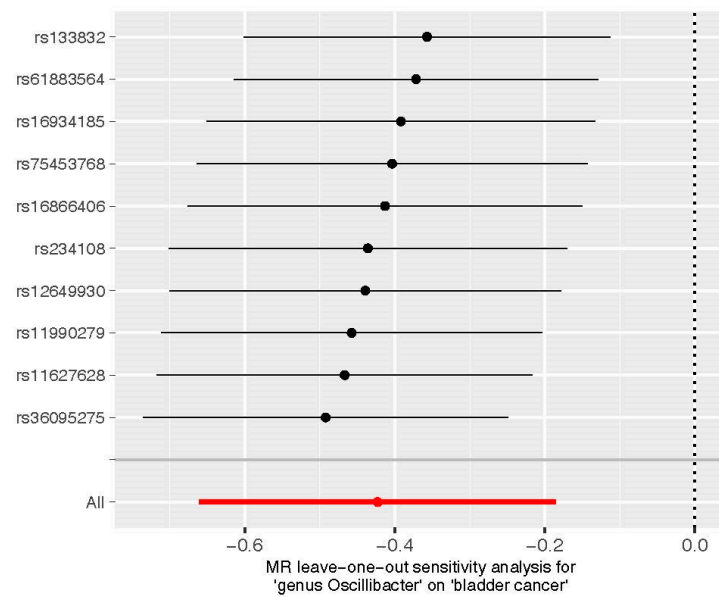

**Figure S49.** The leave-one-out test of genus *Oscillibacter* on bladder cancer

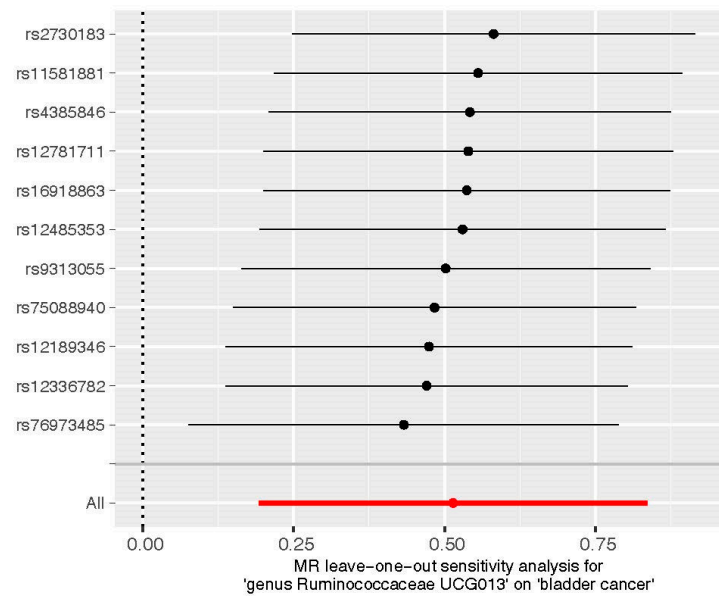

**Figure S50.** The leave-one-out test of genus *Ruminococcaceae* UCG013 on bladder cancer

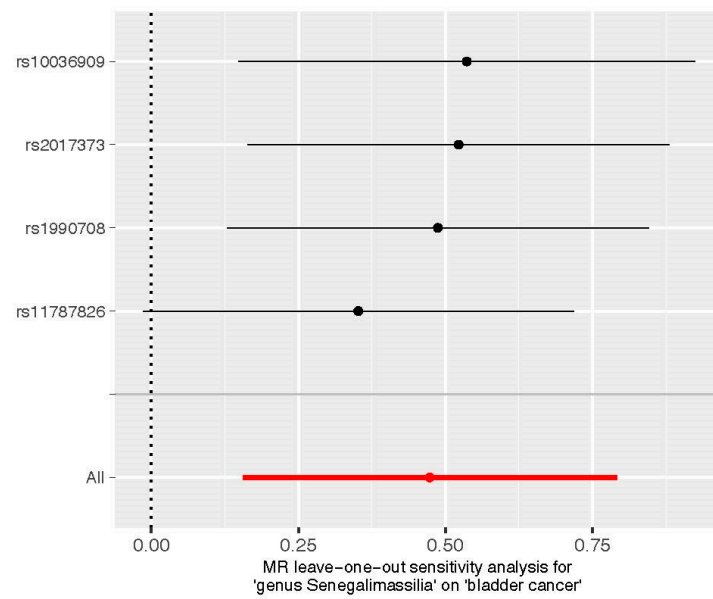

**Figure S51.** The leave-one-out test of genus *Senegalimassilia* on bladder cancer

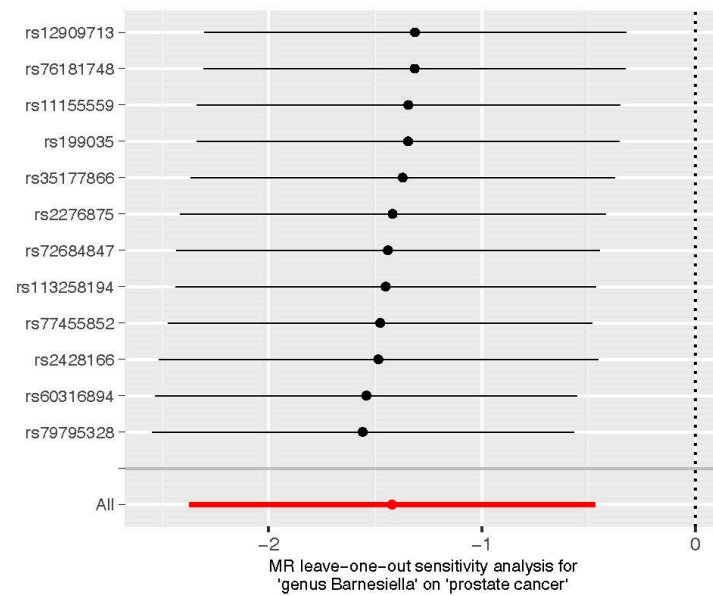

**Figure S52.** The leave-one-out test of genus *Barnesiella* on prostate cancer

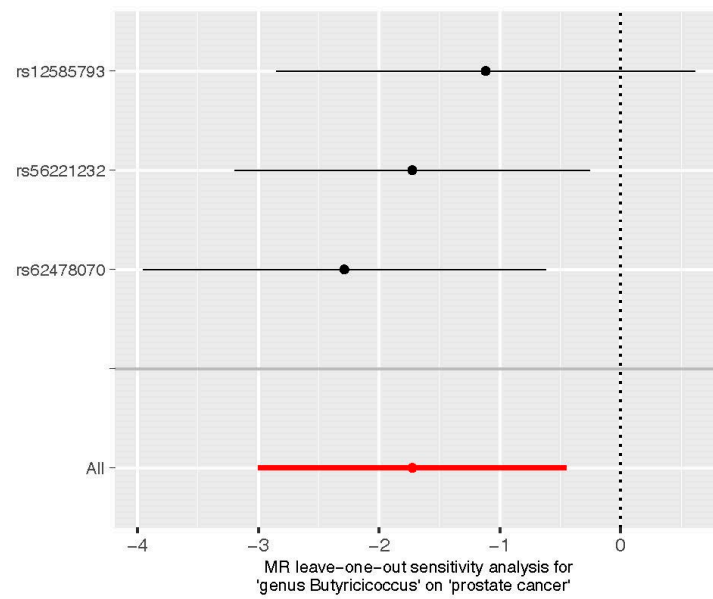

**Figure S53.** The leave-one-out test of genus *Butyricicoccus* on prostate cancer

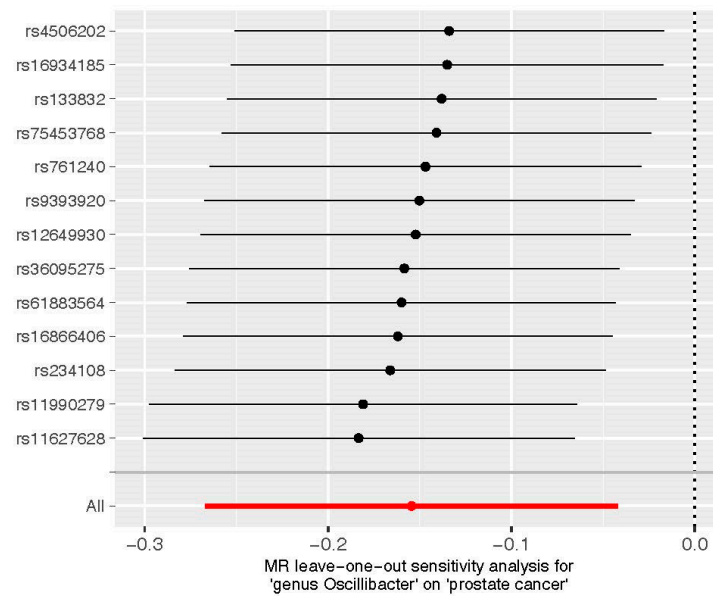

**Figure S54.** The leave-one-out test of genus *Oscillibacter* on prostate cancer

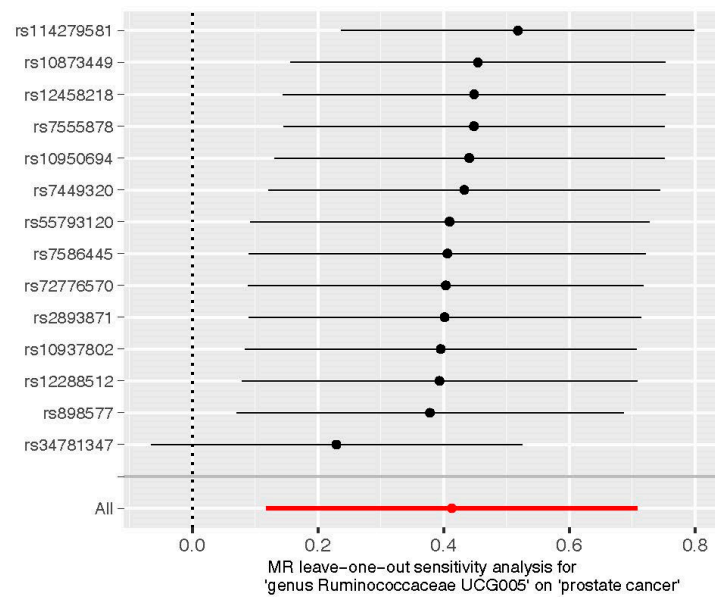

**Figure S55.** The leave-one-out test of genus Ruminococcaceae UCG005 on prostate cancer

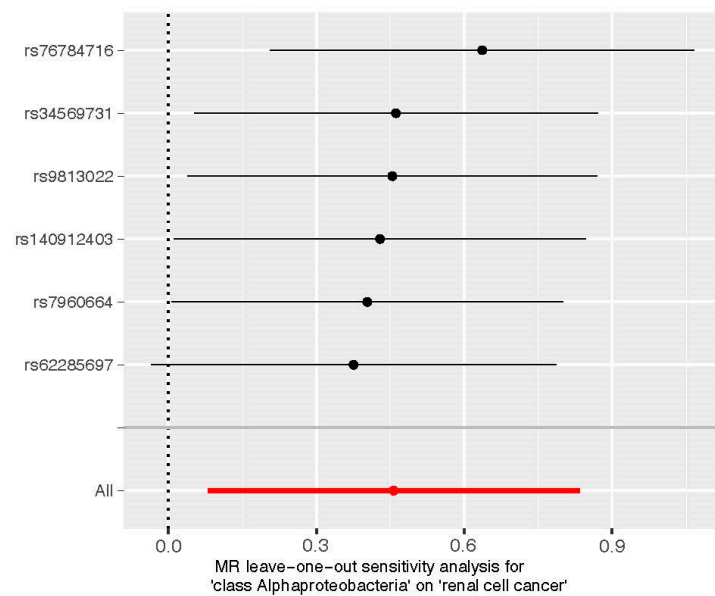

**Figure S56.** The leave-one-out test of class Alphaproteobacteria on renal cell cancer



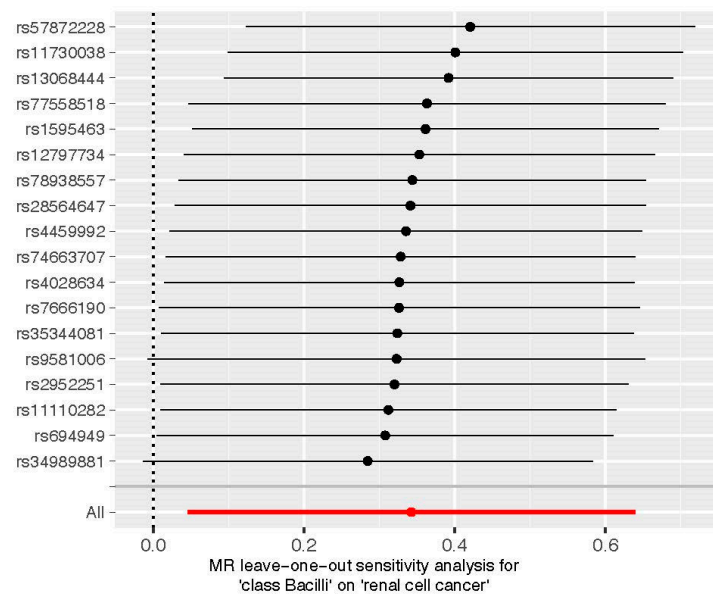

**Figure S57.** The leave-one-out test of class Bacilli on renal cell cancer

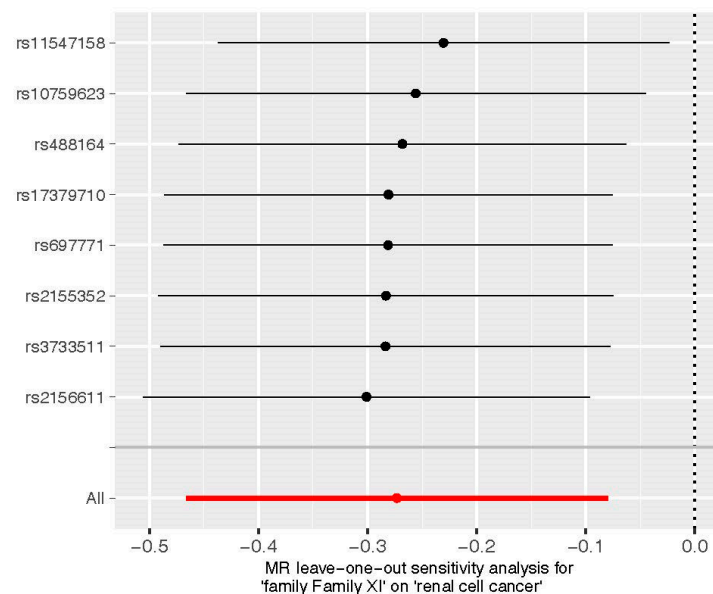

**Figure S58.** The leave-one-out test of family FamilyXI on renal cell cancer

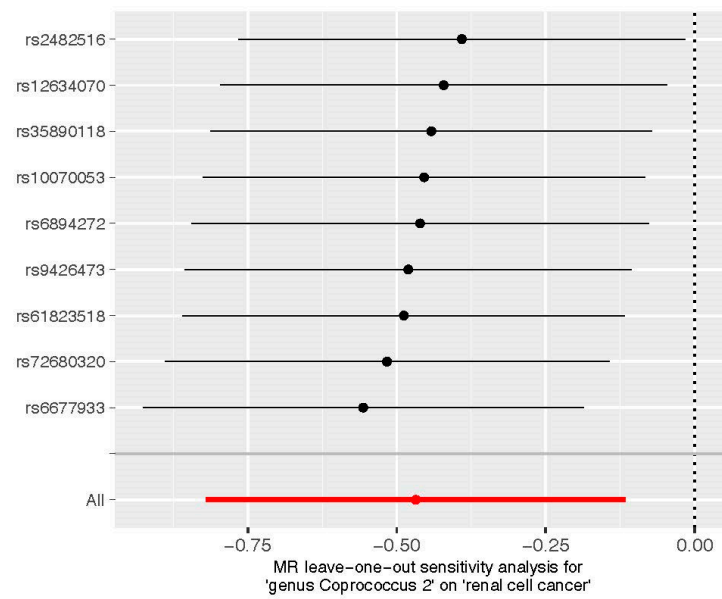

**Figure S59.** The leave-one-out test of genus *Coprococcus* 2 on renal cell cancer

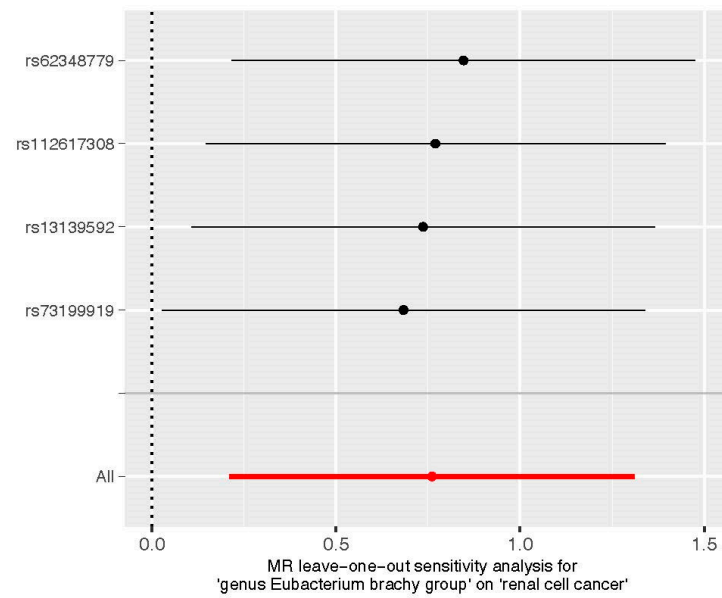

**Figure S60.** The leave-one-out test of genus *Eubacterium* brachy group on renal cell cancer

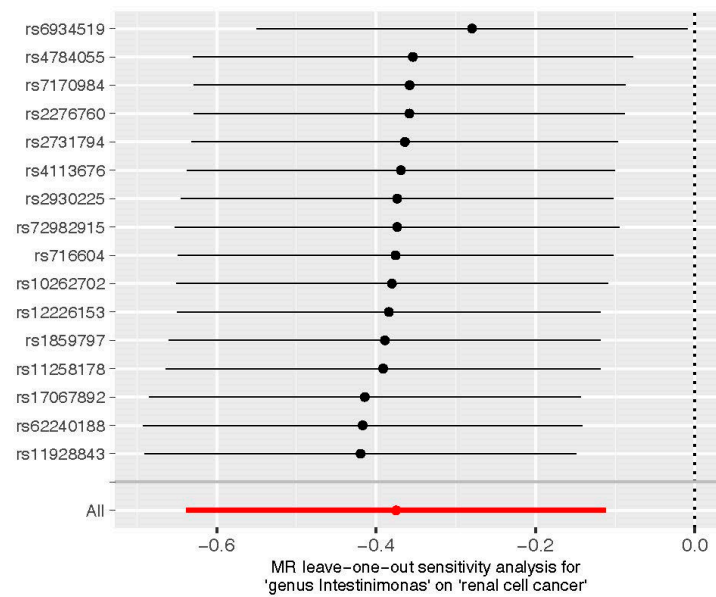

**Figure S61.** The leave-one-out test of genus *Intestinimonas* on renal cell cancer

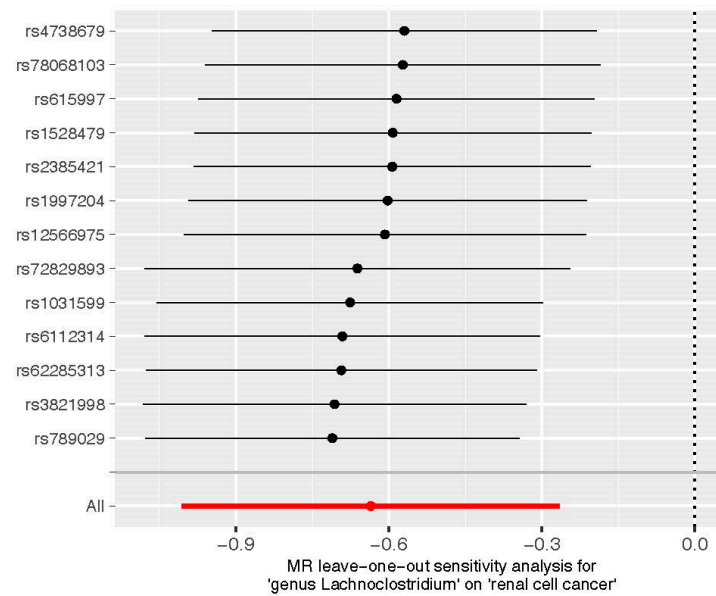

**Figure S62.** The leave-one-out test of genus *Lachnoclostridium* on renal cell cancer

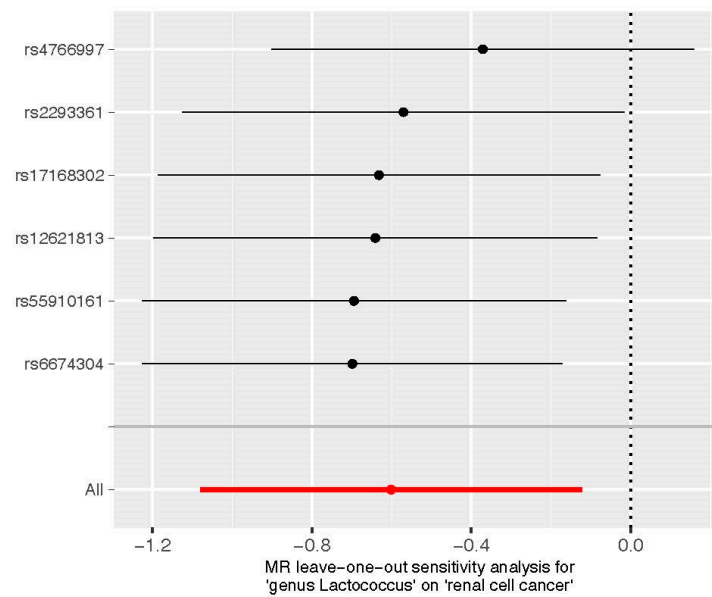

**Figure S63.** The leave-one-out test of genus *Lactococcus* on renal cell cancer

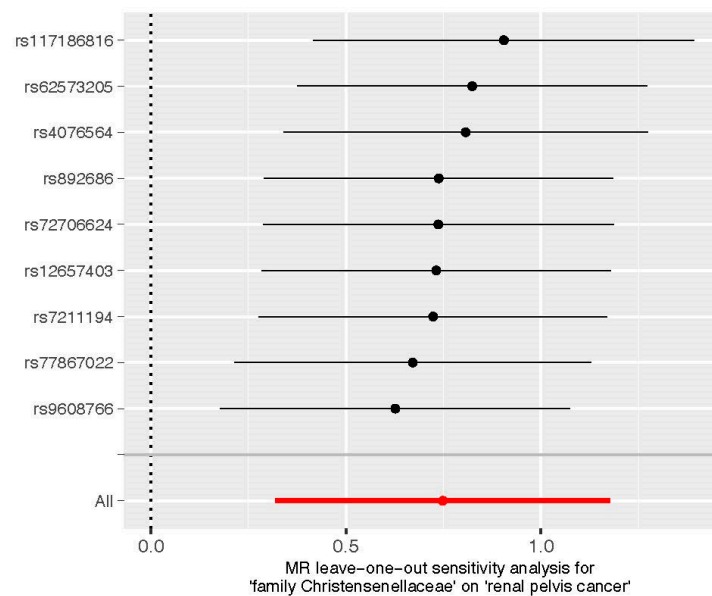

**Figure S64.** The leave-one-out test of family *Christensenellaceae* on renal pelvis cancer

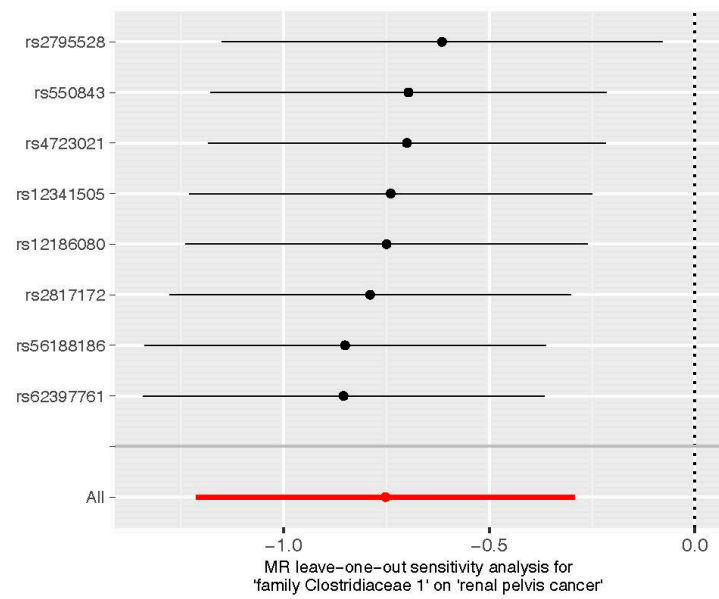

**Figure S65.** The leave-one-out test of family Clostridiaceae 1 on renal pelvis cancer

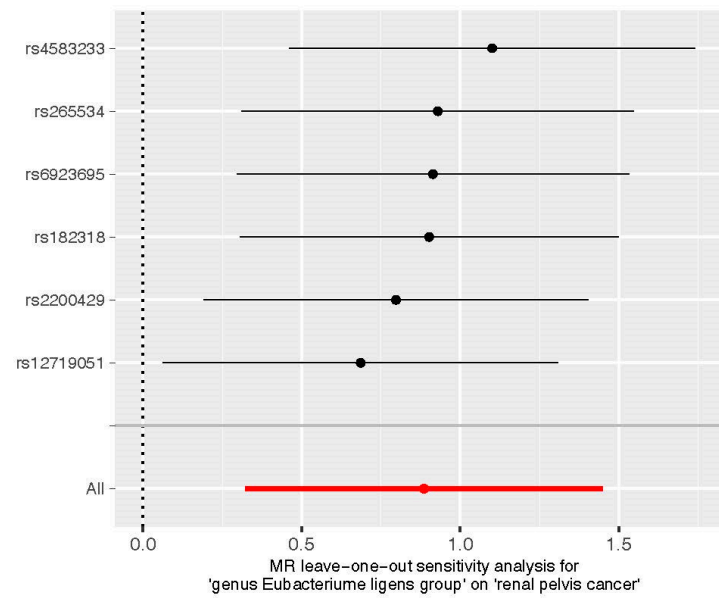

**Figure S66.** The leave-one-out test of genus Eubacterium eligens group on renal pelvis cancer

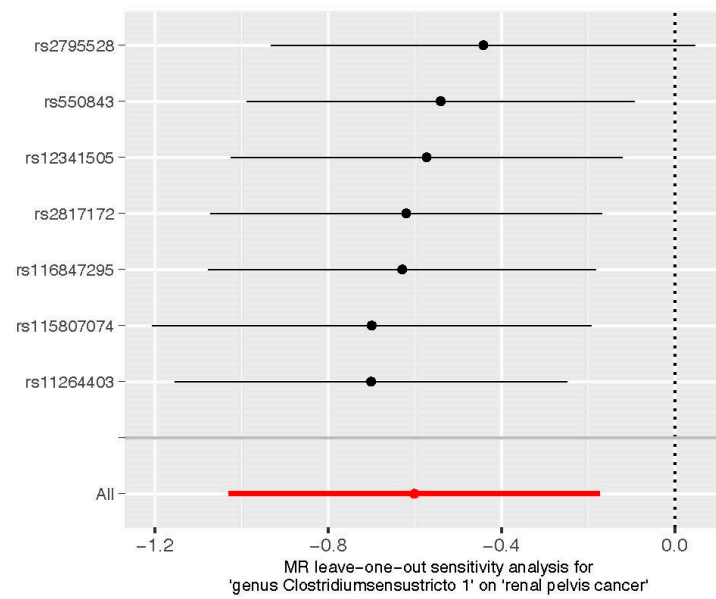

**Figure S67.** The leave-one-out test of genus *Clostridium sensu stricto 1* on renal pelvis cancer

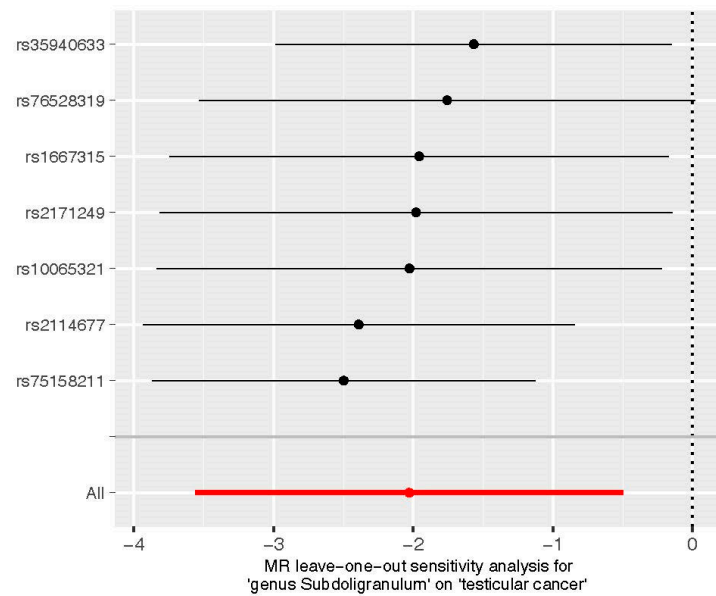

**Figure S68.** The leave-one-out test of genus *Subdoligranulum* on testicular cancer

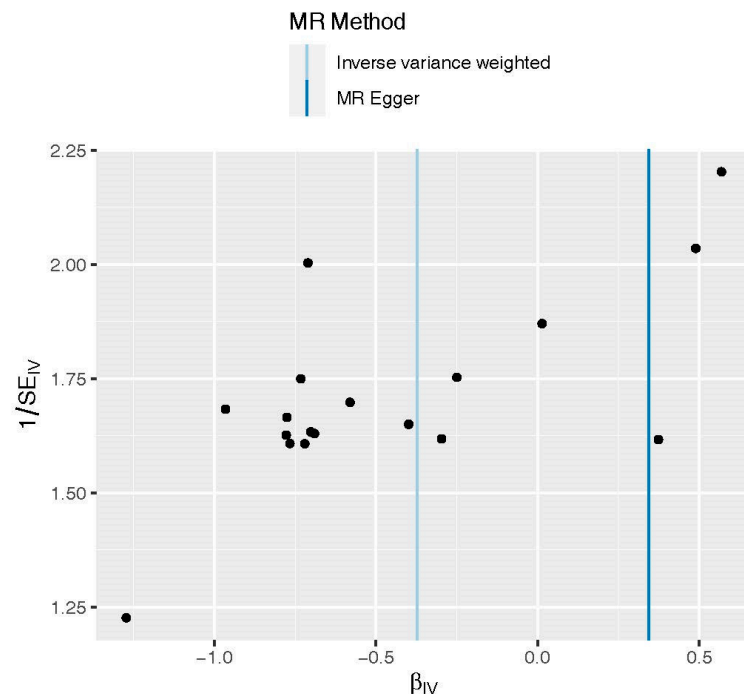

**Figure S69.** The funnel plot of family Rikenellaceae on bladder cancer

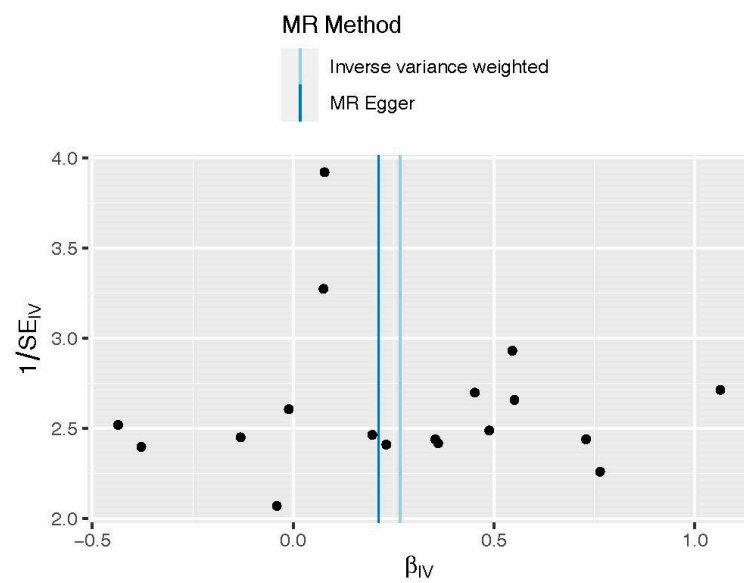

**Figure S70.** The funnel plot of genus Eubacterium ruminantium group on bladder cancer

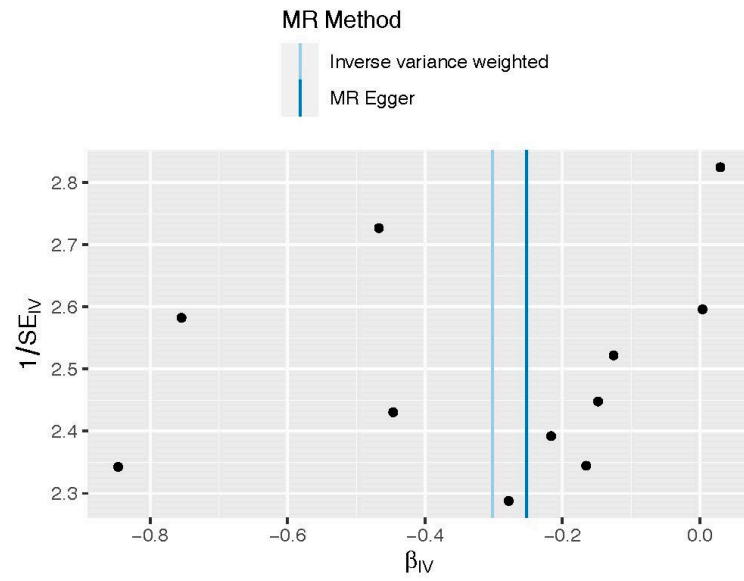

**Figure S71.** The funnel plot of genus *Lachnospiraceae* UCG001 on bladder cancer

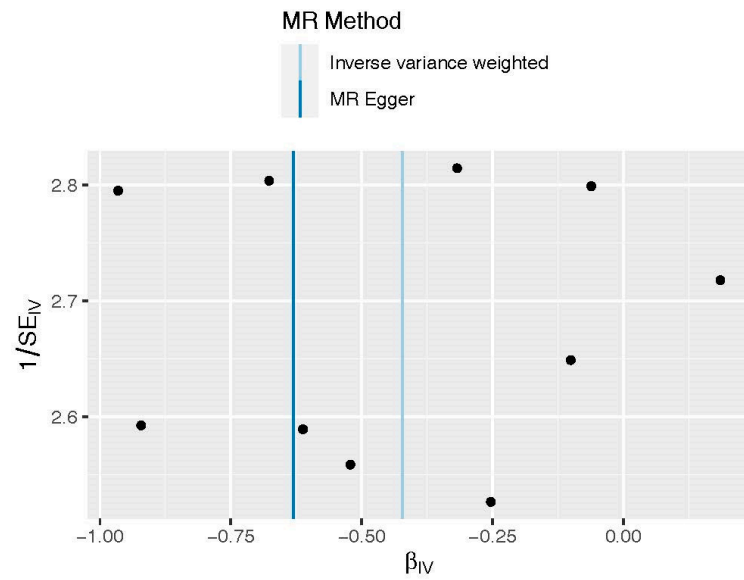

**Figure S72.** The funnel plot of genus *Oscillibacte* on bladder cancer



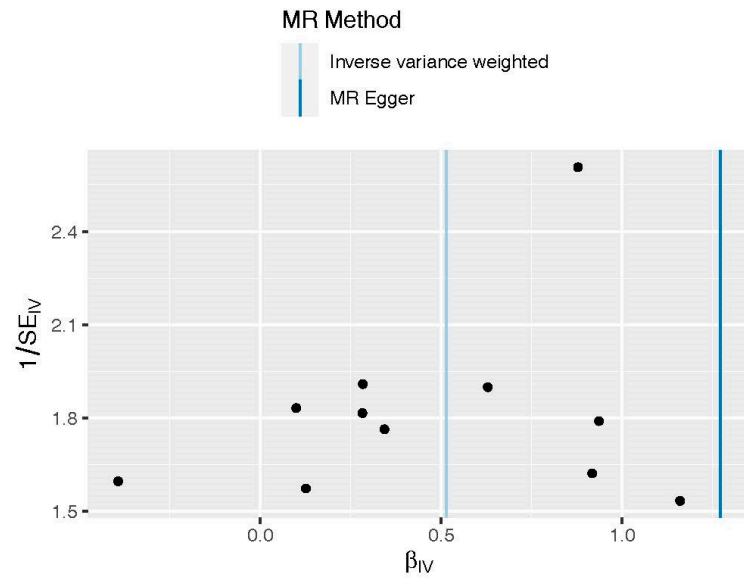

**Figure S73.** The funnel plot of genus Ruminococcaceae UCG013 on bladder cancer

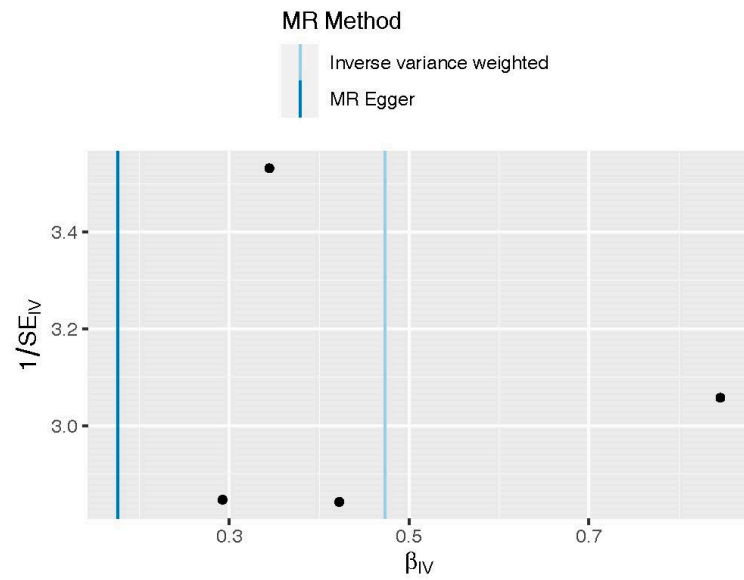

**Figure S74.** The funnel plot of genus Senegalimassilia on bladder cancer

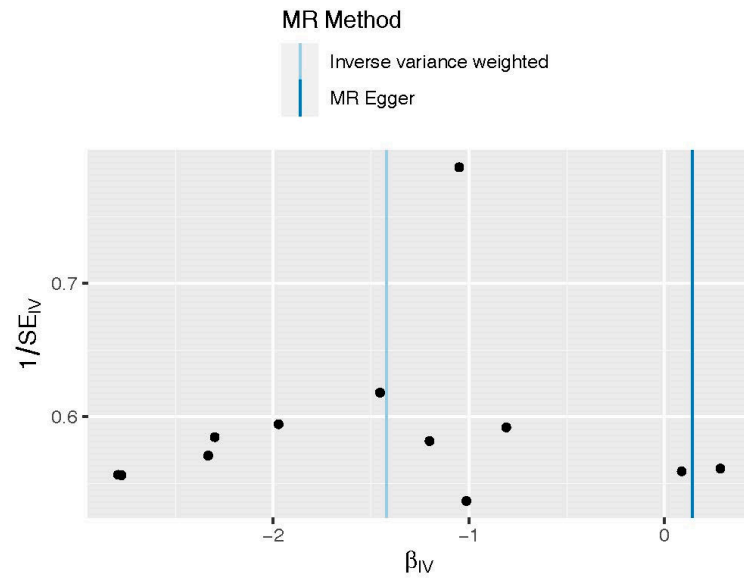

**Figure S75.** The funnel plot of genus Barnesia on prostate cancer

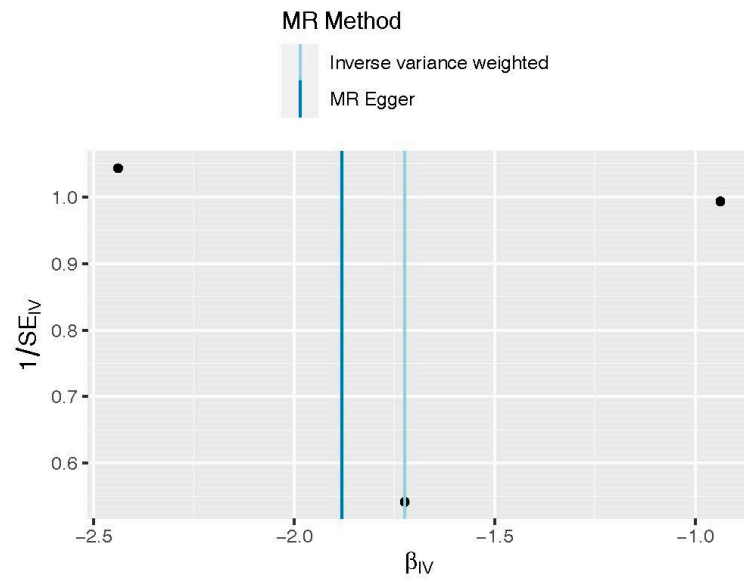

**Figure S76.** The funnel plot of genus Butyricoccus on prostate cancer

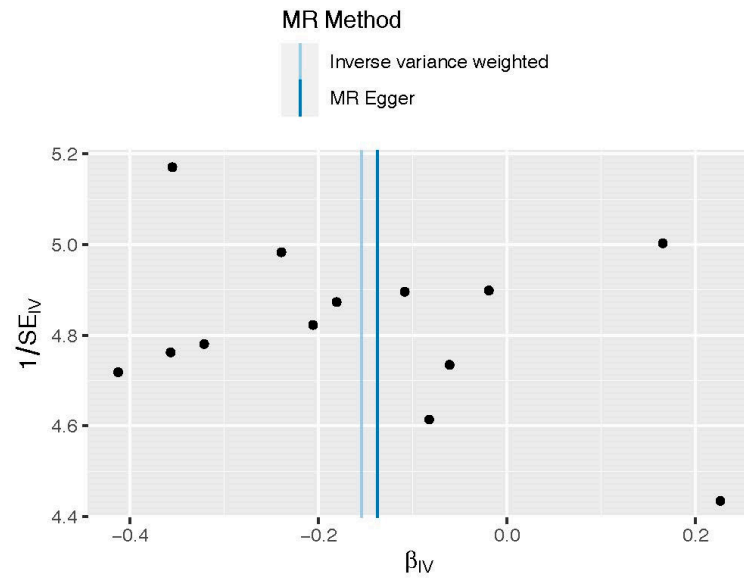

**Figure S77.** The funnel plot of genus *Oscillibacter* on prostate cancer

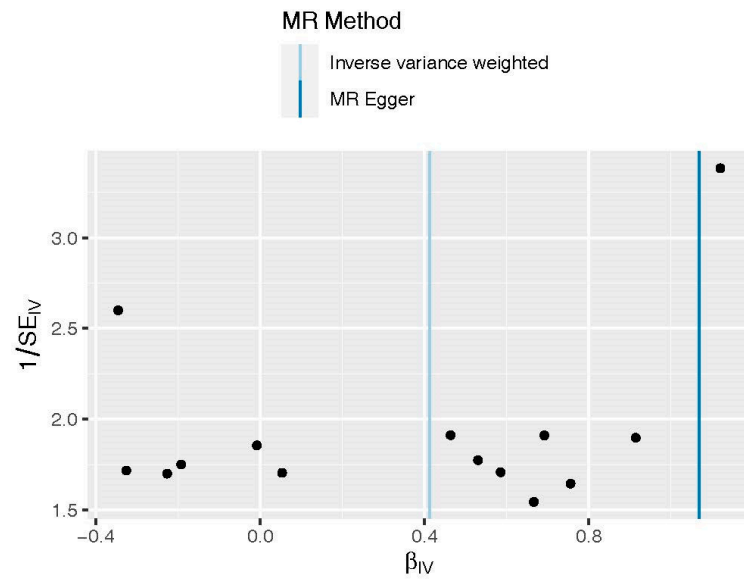

**Figure S78.** The funnel plot of genus *Ruminococcaceae* UCG005 on prostate cancer

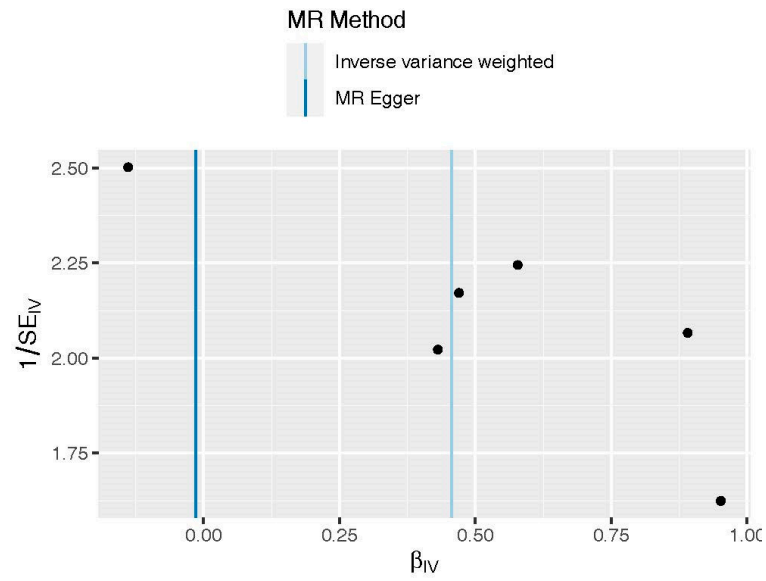

**Figure S79.** The funnel plot of class Alphaproteobacteria on renal cell cancer

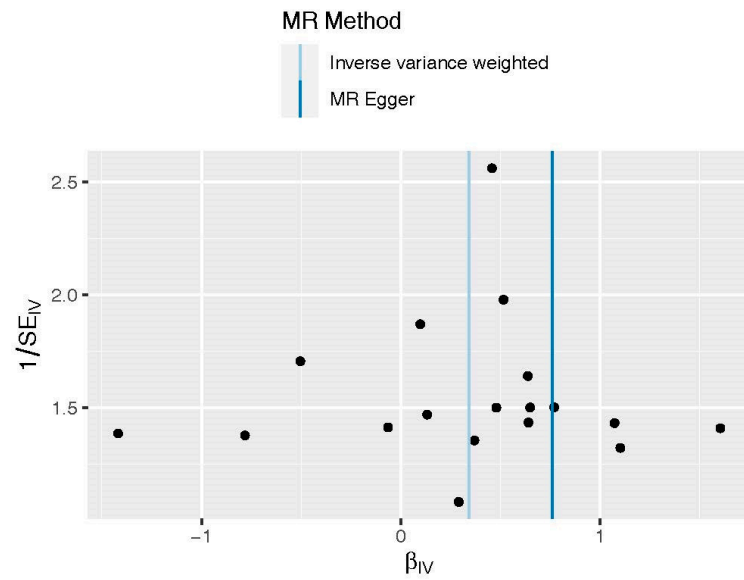

**Figure S80.** The funnel plot of class Bacilli on renal cell cancer

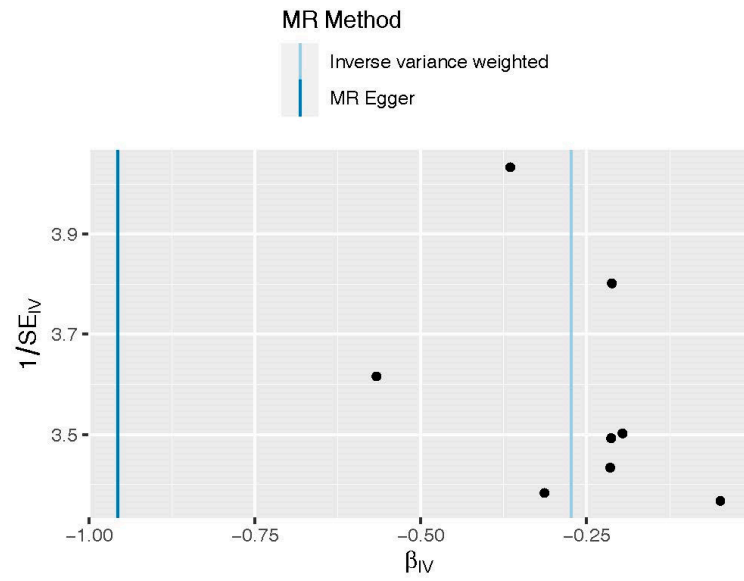

**Figure S81.** The funnel plot of family FamilyXI on renal cell cancer

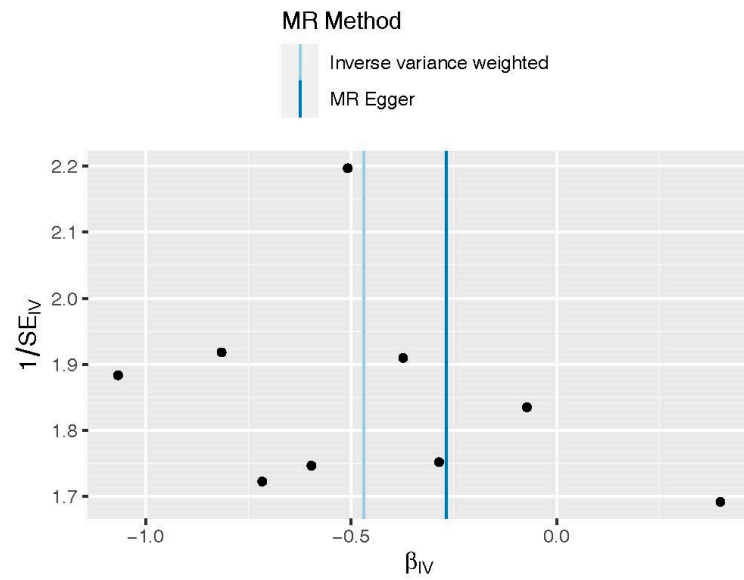

**Figure S82.** The funnel plot of genus Coprococcus 2 on renal cell cancer



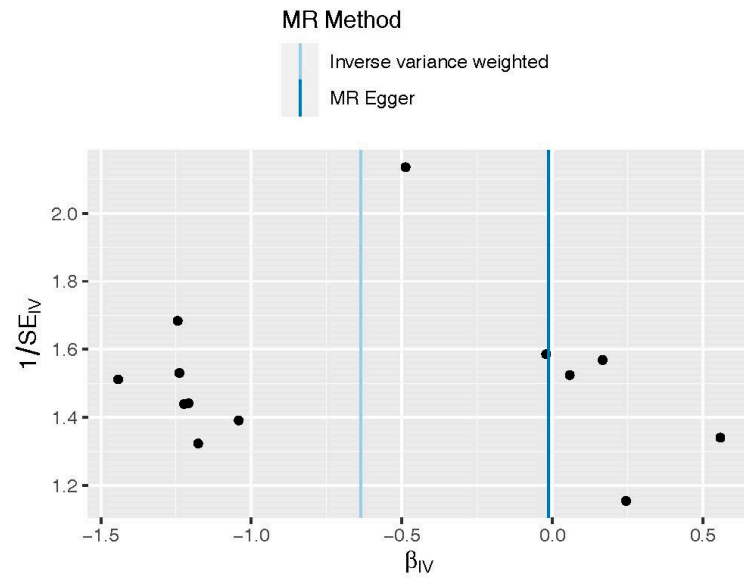

**Figure S85.** The funnel plot of genus *Lachnospirillum* on renal cell cancer

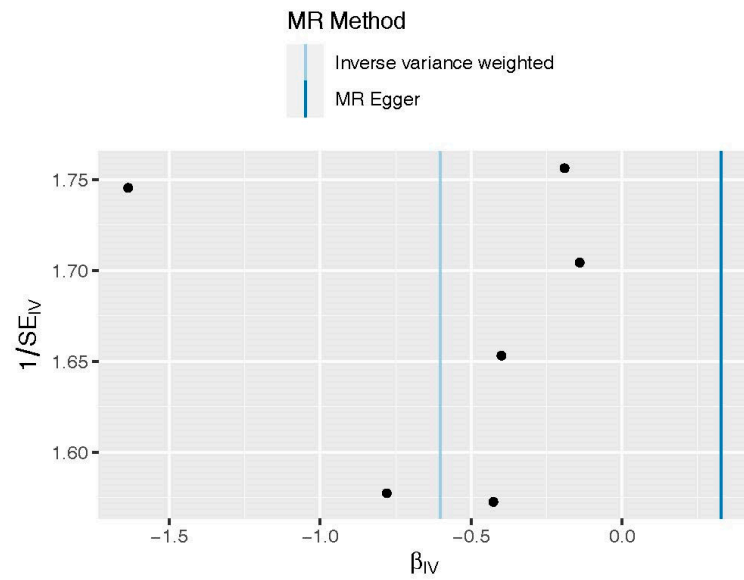

**Figure S86.** The funnel plot of genus *Lactococcus* on renal cell cancer

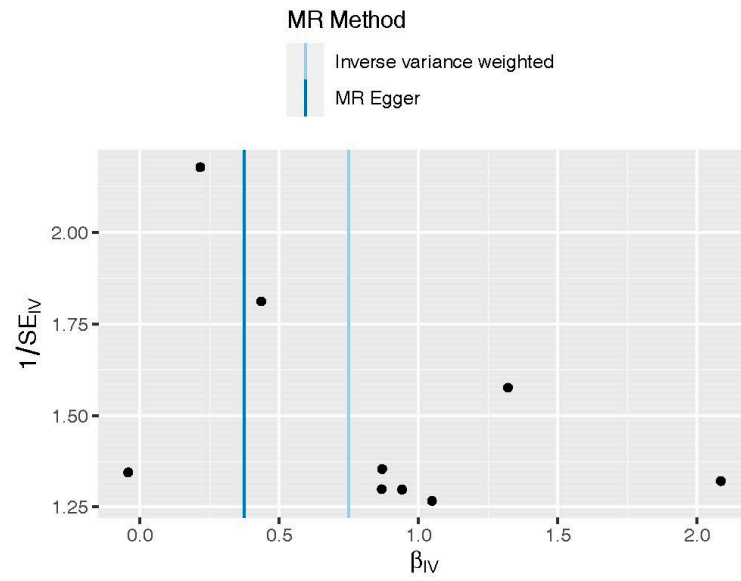

**Figure S87.** The funnel plot of family Christensenellaceae on renal cell cancer

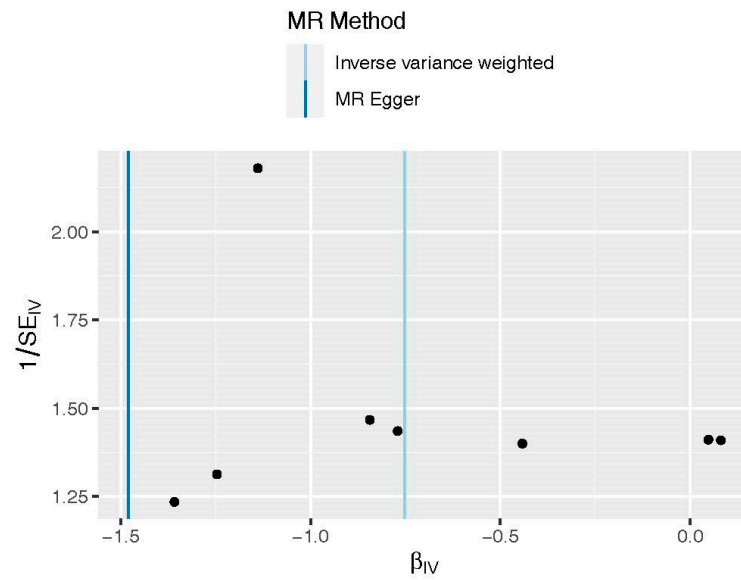

**Figure S88.** The funnel plot of family Clostridiaceae 1 on renal cell cancer



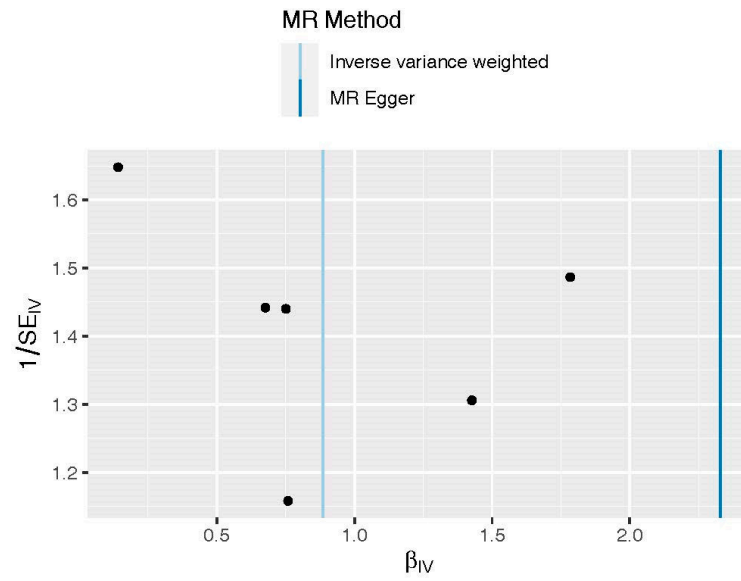

**Figure S89.** The funnel plot of genus *Eubacterium eligens* group on renal cell cancer

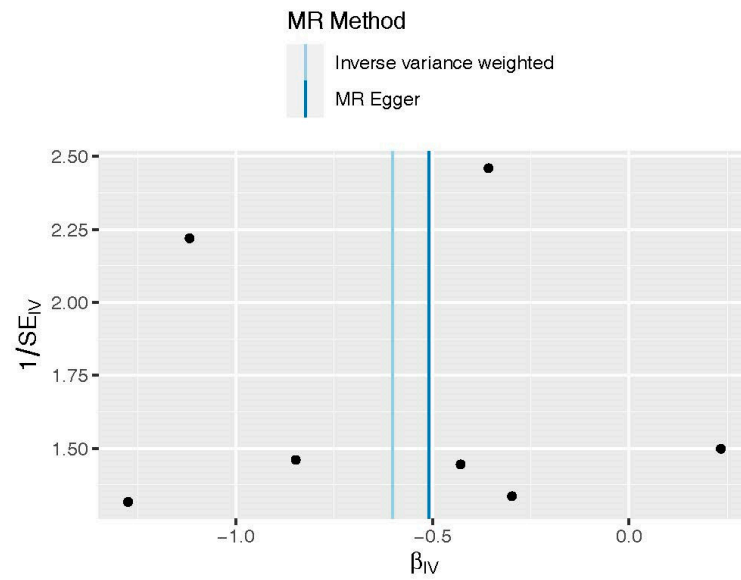

**Figure S90.** The funnel plot of genus *Clostridium sensu stricto* 1 on renal cell cancer

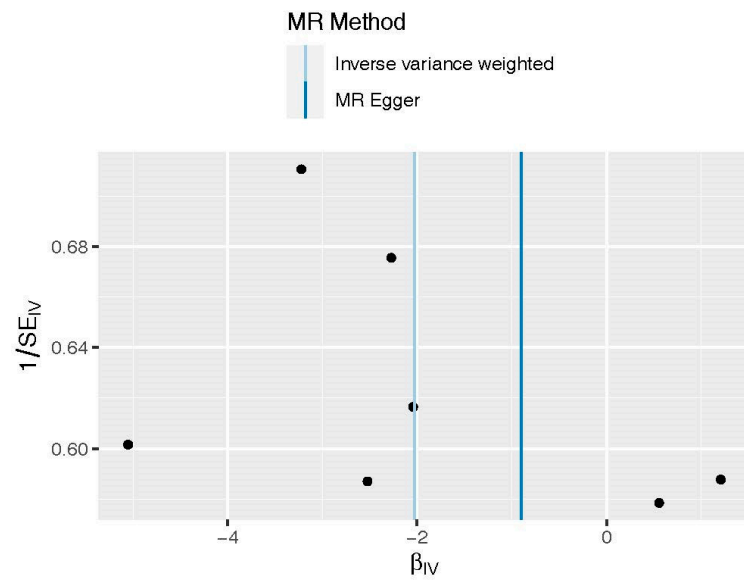

**Figure S91.** The funnel plot of genus Subdoligranulum on testicular cancer
